# Supplementary material for: The Diversification of the LIM Superclass at the Base of the Metazoa Increased Subcellular Complexity and Promoted Multicellular Specialization
Source: PLoS One. 2012 Mar 15;7(3):e33261. doi: 10.1371/journal.pone.0033261 (PMC3305314; doi:10.1371/journal.pone.0033261)
Supplement: Figure S3 — LIM domain tree in Newick format. Newick version of Figure S2. This file can be opened and manipulated in tree-viewing software like Figtree or Treeview. (TRE) [file pone.0033261.s003.tre]

((((((('Hs_LDB3-2.A':0.1480999999999999,('Hs_PDLIM7-2.A':0.4217400000000002,'Hs_PDLIM5-b.A':0.09519999999999973):0.0):0.08963999999999972,('Dm_Tungus.B':0.025329999999999853,'Dm_Tungus.B-i':0.10877999999999988):0.23866999999999994):0.11152000000000006,'Nv_239144.A':0.18726999999999983):0.06485999999999992,('Ml_108023b.A':0.35004000000000035,'Aq_217763.A':0.26636000000000015):0.2359899999999997):0.1082200000000002,('Co_08582T0.B':0.35195,(('Ml_12076b.E':0.2779799999999999,'Aq_215055.E':0.14373000000000014):0.07489000000000035,((('Ml_128211a.E':0.49426000000000014,'Ta_18460.E':0.07335000000000047):0.21926999999999985,(('Hs_LIMS1-b.E':1.0,(Hs_LIMS2-2-E:0.008599999999999941,'Hs_LIMS2-1.E':0.009030000000000094):0.0654300000000001):0.05339999999999989,'Dm_stck.E':0.14639000000000024):0.08523000000000014):0.024239999999999817,('Co_04083T0.E':0.5059300000000002,'Nv_160257.E':0.04614000000000029):0.0725699999999998):0.09238000000000035):0.18717999999999968):0.05865000000000009):0.06459999999999999,(((('Co_07046T1.C':0.9999999999999998,'Co_07046T0.C':0.9999999999999998):0.39883000000000024,(((((('Mb_19246.B':0.5174799999999999,(('Co_03477T0.B':0.38251999999999997,(((('Ta_28417.B':0.53617,'Ml_04674a.B':0.25493999999999994):0.08322999999999992,'Ml_093519b.B':0.3188500000000001):0.20073000000000008,(((('Mb_30838.B':0.9817799999999999,('Aq_211654.B':0.7802800000000001,'Co_00929T0.F':1.0000000000000002):0.0):0.28398999999999996,'Co_06928T0.E':0.61862):0.25351999999999997,(('Co_00751T0.D':0.48709999999999987,'Co_02521T0.B':0.31826):0.16142999999999974,(((('Aq_216587.B':0.33229,'Dm_unc-115.B':0.12074999999999991):0.16108999999999996,'Nv_164443.B':0.3261099999999999):0.0,'Hs_ABLIM3.B':0.12694000000000005):0.12563000000000013,('Ta_55975.A':0.89388,('Hs_ABLIM2.B':0.06837000000000004,'Hs_ABLIM1-b.B':0.14040000000000008):0.0):0.0614800000000002):0.08927999999999958):0.0867300000000002):0.15310000000000024,(('Co_06928T0.D':0.50441,'Aq_229171.A':0.6029199999999999):0.34210000000000007,('Co_07939T0.B':0.25683999999999996,'Co_06928T0.B':0.3891):0.03811000000000009):0.1953800000000001):0.052919999999999856):0.05959000000000003,(((('Nv_164443.D':0.09942999999999991,('Hs_ABLIM1-b.D':0.008390000000000342,(('Hs_ABLIM2.D':0.0856300000000001,'Hs_ABLIM3.D':0.09400999999999993):0.04858000000000007,'Aq_216587.D':0.37402999999999986):0.04693000000000014):0.10214999999999996):0.03803999999999963,'Dm_unc-115.D':0.2810299999999999):0.07629000000000019,((((('Mb_31161.B':0.6356300000000001,'Co_00929T0.B':0.4395399999999998):0.32526999999999995,'Co_04350T0.A':0.42077999999999993):0.0856300000000001,('Ta_58696.C':0.47798000000000007,'Ta_28417.D':0.10848999999999998):0.2973300000000001):0.06959999999999988,'Co_00929T0.E':0.60252):0.07573000000000008,'Co_07939T0.E':0.5127299999999999):0.08915000000000006):0.09900999999999982,(((((('Ml_46393a.A':0.2784399999999998,'Ml_15452a.C':0.46774000000000004):0.24033999999999978,'Ml_07501b.E':0.08304):0.3789100000000001,'Ml_06737a.B':0.23107999999999995):0.21764000000000006,'Ml_20602b.B':0.46163):0.14973999999999998,'Ml_064935a.B':0.38439):0.2700199999999997,('Ml_04674a.D':0.054440000000000044,'Ml_093519b.D':0.20591999999999988):0.07106999999999974):0.18316):0.1078800000000002):0.06830999999999987):0.04219000000000017,('Ml_15452a.A':0.5489800000000002,'Co_04622T0.D':0.7545200000000001):0.22192999999999996):0.06947999999999999):0.05689999999999973,('Ml_120740b.A':1.0673599999999999,((((((('Dm_CG31534.A':0.15054999999999996,('Hs_LMO7-1.A':0.20879000000000003,'Hs_LIMCH1-b.A':0.19484000000000012):0.018850000000000033):0.1871100000000001,'Hs_ZNF185-4.A':0.8153700000000002):0.06781000000000015,'Aq_216532.A':0.6916300000000002):0.14137999999999984,'Nv_216756.A':0.6050800000000001):0.19622000000000028,(('Aq_213282.B':0.37060000000000004,'Co_05847T0.B':0.48211000000000004):0.07868999999999993,('Nv_241192.B':0.32306999999999997,(('Hs_LIMK1.B':0.15416000000000007,'Hs_LIMK2-2a.B':0.19636999999999993):0.10611999999999999,'Dm_LIMK1.B':0.11256):0.05452999999999997):0.16945999999999994):0.22795000000000032):0.10602,'Aq_217763.B':0.39509000000000016):0.11331999999999987,(((('Co_05072T0.C':0.23089999999999966,('Mb_38749.B':1.0,'Sr_05818T0.B':0.7902900000000002):0.48168999999999995):0.030870000000000175,('Ml_11321a.C':0.2258199999999997,((('Dm_jub.C':0.14701000000000009,('Hs_WTIP.C':0.12149999999999994,('Hs_JUB-1.C':0.1355900000000001,'Hs_LIMD1.C':0.10515999999999992):0.011439999999999895):0.02559):0.05520999999999998,'Nv_110149.C':0.1308499999999999):0.050920000000000076,((('Nv_132927.C':0.43592999999999993,'Hs_ZYX.C':1.0000000000000002):0.15931000000000006,('Dm_Zyx102EF.C':0.07590999999999992,(('Hs_LPP-a.C':0.11092999999999997,'Hs_FBLIM1-c.C':0.38608):0.0,'Hs_TRIP6.C':0.10932999999999993):0.01699000000000006):0.042829999999999924):0.08014999999999994,'Aq_227874.C':0.45777):0.0):0.26285999999999987):0.1352800000000003):0.1733699999999998,(((('Mb_30838.A':1.1624599999999998,'Co_05072T0.A':0.21174000000000004):0.26078,'Dm_CG30178.B':0.44753):0.16162999999999972,('Co_04110T0.B':0.26032999999999995,'Co_05847T0.A':0.26561999999999997):0.1441699999999999):0.16324000000000005,'Co_06515T0.B':0.31149000000000004):0.00929000000000002):0.06257000000000001,(('Co_08582T0.C':0.8077899999999998,(('Dm_Tungus.A-e':0.03684999999999983,'Dm_Tungus.A':0.03956999999999988):0.28888999999999987,((('Hs_PDLIM2-2.A':0.2984,'Hs_PDLIM1.A':0.09379999999999988):0.1123400000000001,'Hs_PDLIM3-b.A':0.027919999999999945):0.13929999999999954,'Hs_PDLIM4-1.A':0.08357999999999954):0.2195499999999999):0.22243000000000013):0.0,(('Sr_04560T0.A':0.7411800000000002,((('Dm_CG6522.A':0.25683000000000034,'Dm_esn.A':0.30005000000000015):0.0,('Dm_Lmpt.A':0.15591999999999984,((('Mb_22420.A':0.0712299999999999,'Sr_03013T0.A':0.0430299999999999):0.23399999999999999,'Sr_10035T0.A':0.45540999999999987):0.27439999999999976,('Nv_105385.A':1.0,'Nv_51061.A':1.0):0.14685999999999977):0.06573999999999991):0.06974000000000036):0.05844000000000005,(((((('Ml_34571a.A':0.42698000000000036,'Nv_177334.A':0.3142400000000003):0.0415599999999996,'Co_04622T0.B':0.8032799999999998):0.0,(('Nv_79617.A':0.13091000000000008,('Hs_PRICKLE3.A':0.10387999999999997,(((('Ml_148516a.A':0.47448,'Hs_PRICKLE4.A':0.06818999999999997):0.21045000000000003,'Dm_pk.A':0.17852):0.07827000000000006,'Hs_PRICKLE2.A':0.018410000000000037):0.023050000000000015,'Hs_PRICKLE1.A':0.04432999999999998):0.0):0.06372):0.04600000000000004,(('Hs_TES-2.A':0.12088999999999994,'Hs_LMCD1.A':0.1847000000000001):0.18338999999999994,('Ta_26089.A':0.26132,'Nv_158093.A':0.023309999999999942):0.06227000000000005):0.03317999999999999):0.07417999999999969):0.05294000000000043,'Aq_217773.A':0.23995000000000033):0.032649999999999846,'Ml_218921a.A':0.3022):0.09148000000000023,'Aq_217335.A':0.2744500000000003):0.0):0.11509999999999998):0.13415,((((('Dm_Awh.B':0.09356999999999993,('Nv_246590.B':0.06770999999999994,('Hs_LHX8.B':0.031239999999999934,'Hs_LHX6-1.B':0.061229999999999896):0.11328000000000005):0.06757999999999997):0.17202000000000028,('Ta_30944.B':0.4860199999999999,('Ml_053012a.B':0.23385999999999973,('Dm_tup.B':0.16064999999999996,('Nv_161808.B':0.024480000000000057,('Hs_ISL1.B':1.0,'Hs_ISL2.B':0.17870000000000008):0.04544999999999999):0.05301):0.13544999999999985):0.0):0.13137000000000043):0.050599999999999756,('Aq_230128.B':0.36680999999999986,('Ta_14836.B':0.3188500000000003,('Hs_LHX9-2.B':0.019369999999999887,('Dm_ap.B':0.3325100000000001,'Hs_LHX2.B':0.0093700000000001):0.01910999999999996):0.10885000000000034):0.015729999999999578):0.03393000000000024):0.029129999999999878,(('Nv_98128.B':0.27299000000000007,(('Hs_LMO4.B':0.08162000000000003,'Nv_170252.B':0.16209000000000007):0.13518999999999992,((('Dm_Bx.B':0.0615699999999999,('Hs_LMO1.B':0.0030399999999999316,'Hs_LMO3.B':0.015090000000000048):0.08428999999999998):0.009640000000000093,'Hs_LMO2-2.B':0.3530199999999999):0.0,('Nv_53046.B':0.1999900000000001,'Nv_197606.B':0.040019999999999945):0.0500799999999999):0.16660999999999992):0.11773999999999996):0.011359999999999815,((((('Ml_RB056951.B':0.16365000000000007,'Dm_CG5708.B':0.42799999999999994):0.40063000000000004,('Nv_15442.B':0.3040900000000002,'Ta_20649.B':0.28524000000000016):0.028039999999999843):0.08197999999999972,('Aq_LHX3.B':0.05339000000000005,(('Dm_Lim3.B':0.09253,'Ml_068131a.B':0.2328699999999999):0.05252000000000012,('Hs_LHX3-a.B':0.02970000000000006,'Hs_LHX4.B':0.03705000000000003):0.06019000000000019):0.010329999999999728):0.1275599999999999):0.008930000000000327,('Nv_109857.B':0.272,('Ml_132520a.B':0.4208799999999999,(('Aq_218857.B':0.33885999999999994,'Ta_30033.B':0.22494999999999998):0.056219999999999715,('Dm_Lim1.B':0.053469999999999906,('Hs_LHX5.B':1.0,'Hs_LHX1.B':0.03620000000000001):0.06855000000000011):0.09586999999999968):0.04255000000000031):0.0):0.09037000000000006):0.04319000000000006,(('Dm_CG32105.B':0.45185999999999993,'Dm_CG4328.B':0.30742):0.019749999999999934,('Hs_LMX1A.B':0.02475000000000005,'Hs_LMX1B.B':0.07438999999999996):0.08979000000000004):0.22605999999999993):0.039819999999999744):0.018460000000000143):0.08549000000000007,('Sr_07306T0.C':0.5898699999999999,'Ta_16471.B':0.24197999999999986):0.1394000000000002):0.1669900000000002):0.10541999999999963):0.014639999999999986):0.02803000000000022):0.0609099999999998):0.0):0.040320000000000356,('Mb_26008.A':0.75257,'Hs_ZYX.A':0.4191499999999997):0.11665000000000036):0.032649999999999846,'Ml_15452a.B':0.6588699999999998):0.0,(('Aq_215865.A':0.38088999999999995,((('Co_04622T0.A':0.41473000000000004,'Co_04084T0.B':0.08912000000000009):0.21636999999999995,((('Dm_Rassf.A':0.061630000000000074,'Nv_108380.A':0.12385000000000002):0.1981900000000003,'Hs_CRIP3.B':0.08535000000000004):0.04108999999999963,(('Hs_CRIP2.B':0.022040000000000504,('Nv_247501.A':0.07364000000000015,('Hs_CRIP1.A':0.0495000000000001,('Aq_223455.A':0.06658000000000008,(('Nv_132315.A':0.05153999999999992,'Co_04145T0.A':0.1956199999999999):0.005640000000000089,('Mb_31118.A':0.07843,'Sr_00195T0.A':0.07862999999999998):0.1268100000000001):0.04259999999999997):0.024410000000000043):0.03886000000000012):0.050370000000000026):0.019299999999999873,('Hs_CRIP2.A':0.08790000000000009,'Hs_CRIP3.A':0.12661999999999995):0.03811000000000009):0.03189999999999982):0.1477400000000002):0.06596000000000002,(('Ml_02959a.A':0.18033999999999972,('Ml_02959a.B':0.29918,((('Co_02875T0.A':0.15378000000000003,('Nv_52979.B':0.07292999999999994,('Co_04622T0.F':0.6014999999999999,'Nv_52979.A':0.09216000000000002):0.07156999999999991):0.04970000000000008):0.03330999999999995,('Nv_68197.A':1.0,'Nv_78916.A':1.0):0.19021):0.04389000000000021,(((('Aq_222999.A':0.25431000000000004,('Dm_Mlp84B.A':0.02812999999999999,'Dm_Mlp60A.A':0.05549000000000004):0.07939999999999992):0.06625999999999999,'Nv_214299.B':0.22232000000000007):0.04907000000000017,((('Aq_222999.B':1.0000000000000002,'Aq_223000.A':1.0000000000000002):0.08536999999999995,(('Hs_CSRP2.B':0.06004000000000009,'Hs_CSRP1-1.B':0.07092999999999994):0.017300000000000093,'Hs_CSRP3.2.B':0.07847999999999988):0.07068999999999992):0.03625999999999996,'Co_02875T0.B':0.14738000000000007):0.058000000000000274):0.01823999999999959,((('Dm_Mlp60A.B':0.13735999999999993,'Dm_Mlp84B.B':0.09454000000000007):0.1117999999999999,(((('Dm_Mlp60A.D':0.14030999999999993,'Dm_Mlp84B.D':0.02395999999999998):0.07491000000000003,('Dm_Mlp60A.E':0.1988000000000001,'Dm_Mlp84B.E':0.9999999999999998):0.16196999999999995):0.08733999999999997,'Dm_Mlp84B.C':0.048229999999999995):0.06225999999999998,'Dm_Mlp60A.C':0.06259999999999999):0.033199999999999896):0.19568999999999992,(('Nv_214299.A-2':1.0000000000000002,'Nv_214299.A-1':1.0000000000000002):0.2015800000000001,(('Hs_CSRP3.2.A':0.09254999999999991,('Hs_CSRP2.A':0.03357999999999994,'Hs_CSRP1-1.A':0.07479999999999998):0.05996000000000001):0.0686199999999999,'Nv_123146.A':0.4063300000000001):0.034969999999999946):0.08634999999999993):0.028369999999999784):0.029690000000000438):0.11642999999999981):0.06745000000000001):0.05349000000000004,((('Mb_26008.B':0.6399300000000001,'Dm_MICALlike.A':0.2954699999999999):0.28366999999999987,((('Co_00633T0.A':0.49866999999999995,'Mb_26577.A':0.07787999999999995):0.05610000000000026,(('Sr_02877T0.A':0.08214999999999995,('Ta_9099.A':0.16016999999999992,'Mb_24292.A':0.0605):0.0424199999999999):0.04361999999999977,(('Mb_13898.A':0.09211999999999998,'Sr_09982T0.A':0.08878999999999992):0.11884000000000006,(('Nv_9977.A':0.59023,('Mb_3283.A':0.06194999999999995,'Sr_07101T0.A':0.10061999999999993):0.034049999999999914):0.02340999999999993,(('Co_07267T0.A':0.19846999999999992,('Nv_79564.A':0.09105999999999992,(((('Sr_05830T0.A':0.024920000000000053,('Mb_11965.A':0.11748999999999987,'Mb_14597.A':0.0842099999999999):0.08725000000000005):0.39108999999999994,((('Ml_-27321b.A':0.3445799999999999,('Hs_MICAL1-1.A':0.3642400000000001,('Hs_MICALL2-1.A':0.1089199999999999,'Hs_MICALL1.A':0.18497999999999992):0.2016):0.08166000000000007):0.06142000000000003,'Nv_238942.A':0.3124800000000001):0.07235999999999998,('Aq_224949.A':0.21319,((('Dm_Hil.A':0.74716,(('Ml_08716b.A':0.43854000000000015,('Ta_53655.A':0.67265,'Aq_218278.A':0.2780800000000001):0.0):0.1178300000000001,'Dm_Mical.A':0.24731000000000014):0.0):0.16613999999999995,'Hs_MICAL2.A':0.07356000000000007):0.09133999999999998,'Hs_MICAL3-1.A':0.10305999999999993):0.09396000000000004):0.02719999999999989):0.07355):0.07563000000000009,(('Hs_LIMA1-c.A':0.09214000000000011,('Co_08158T0.A':0.5278100000000001,'Hs_XIRP2-2.A':0.05496999999999996):0.017679999999999918):0.01689000000000007,'Hs_LIMD2.A':0.12819000000000003):0.0649900000000001):0.02418000000000009,'Aq_213741.A':0.19038):0.04750999999999994):0.0):0.04923000000000011,('Mb_16167.A':0.1322399999999999,'Sr_09345T0.A':0.16698999999999997):0.060270000000000046):0.0):0.05123999999999995):0.0026199999999998447):0.01517000000000035):0.0978399999999997,'Dm_CG33521.A':0.46675):0.0565500000000001):0.10000999999999971,('Co_00929T0.C':0.4641500000000003,('Ml_038835b.A':0.06874000000000002,(('Hs_LASP1.A':1.0,('Hs_NRAP-C.A':0.25003,'Hs_NEBL-2.A':0.021649999999999947):0.03859999999999997):0.06427000000000005,(('Dm_Lasp.A':0.12274000000000007,('Ml_200239a.A':0.10904000000000003,'Nv_178184.A':0.04563000000000006):0.017160000000000064):0.021789999999999976,((('Nv_178189.A':1.0,'Nv_148735.A':1.0):0.09436,'Nv_81835.A':0.03540999999999994):0.04520999999999997,('Co_05568T0.A':0.13785000000000003,(('Mb_34066.A':0.15639000000000003,'Sr_06072T0.A':0.05457000000000001):0.1452199999999999,(('Aq_224097.A':1.0000000000000002,'Aq_224095.A':1.0000000000000002):0.0,'Aq_224096.A':1.0000000000000002):0.048740000000000006):0.029809999999999892):0.017120000000000024):0.02703000000000011):0.04841999999999991):0.02218000000000009):0.3046700000000002):0.11076999999999959):0.03860000000000019):0.042710000000000026):0.16110000000000024):0.12275999999999954,'Co_07516T0.A':0.4699599999999995):0.15907000000000027):0.024629999999999708,((('Sr_08126T0.B':0.4478,(('Dm_CG34325.C':0.2469199999999998,('Dm_CG31988.C':1.0,'Dm_CG31624.C':0.020019999999999705):0.17745999999999995):0.0712600000000001,((((('Ml_07501b.C':0.27678,('Ml_06737a.A':0.13074999999999992,'Ml_20602b.A':0.19618000000000002):0.24038000000000004):0.22908000000000017,'Ml_07501b.D':0.1305900000000002):0.13497000000000003,'Ml_07501b.A':0.47131000000000034):0.0665899999999997,'Co_03826T0.C':0.42704999999999993):0.03155000000000019,'Dm_CG30178.C':0.16422000000000025):0.12918999999999992):0.12684000000000006):0.12095000000000011,(('Sr_07306T0.A':0.6310500000000001,'Ml_064935a.A':0.3076100000000004):0.10783999999999994,((((('Nv_127058.B':0.2328300000000001,('Nv_127058.C':0.2535399999999999,'Nv_177334.F':0.30169):0.10132000000000008):0.17915999999999999,'Nv_177334.E':0.26613):0.09691000000000027,'Nv_127058.A':0.1386700000000003):0.17474999999999952,(((('Hs_FHL5.D':0.3227700000000002,'Hs_FHL2.D':0.11784000000000017):0.04682999999999993,'Nv_105385.E':0.70252):0.04136000000000006,('Hs_FHL3.D':0.15587000000000018,'Dm_Lmpt.E':0.11260000000000003):0.07513000000000014):0.03227999999999964,'Hs_FHL1-2.D':0.15098999999999974):0.03756000000000004):0.17217000000000038,('Ta_13161.B':0.21675999999999984,('Co_03826T0.B':0.4410700000000003,(('Nv_105385.B':1.0,'Nv_51061.B':1.0):0.29076999999999975,('Nv_177334.B':0.3094899999999998,(('Dm_Lmpt.B':1.0,((((((('Nv_79983.A.B':1.0000000000000002,'Nv_158093.B':1.0000000000000002):0.12734,((('Aq_217335.B':0.32918000000000003,('Sr_10035T0.B':0.36715999999999993,'Sr_07306T0.B':0.1915):0.07103999999999999):0.06428999999999996,'Dm_CG6522.B':0.2926500000000001):0.0,('Hs_TES-2.B':0.22384999999999988,'Hs_LMCD1.B':0.4796799999999999):0.08092999999999995):0.04587000000000008):0.0,(('Mb_22420.B':0.11177999999999999,'Sr_03013T0.B':0.11695000000000011):0.34376000000000007,'Sr_04560T0.B':0.25376):0.17758999999999991):0.05293999999999999,(('Hs_PRICKLE4.B':0.4109499999999999,(('Ta_26089.B':0.24360000000000004,('Dm_esn.B':0.05345,'Dm_pk.B':0.04807000000000006):0.06776000000000004):0.03760000000000008,(('Hs_PRICKLE2.B':0.9999999999999998,'Hs_PRICKLE1.B':0.05238999999999994):0.04553000000000007,'Hs_PRICKLE3.B':0.1374900000000001):0.016669999999999963):0.020669999999999966):0.029849999999999932,'Nv_79617.B':0.09922000000000009):0.14612000000000003):0.0,'Aq_217773.B':0.18965999999999994):0.04459999999999997,('Ml_148516b.B':0.87086,'Ml_218921a.B':0.29164999999999996):0.07416):0.03424999999999989,'Ml_34571a.B':0.09706999999999999):0.2098500000000001):0.055629999999999846,(('Hs_FHL3.A':0.31400000000000006,'Hs_FHL2.A':0.1423000000000001):0.07647000000000004,'Hs_FHL5.A':0.17918999999999996):0.2370199999999998):0.05636000000000019):0.0):0.11780000000000035):0.16620999999999952):0.04074000000000044):0.053039999999999754):0.05079000000000011):0.05763999999999969,(((('Co_06515T0.A':0.2774399999999999,('Co_06928T0.C':0.3294800000000002,(('Dm_Zyx102EF.A':0.22147000000000006,('Ml_11321a.A':0.39195999999999986,(('Nv_110149.A':0.16145999999999971,(((('Hs_JUB-1.A':0.1461300000000001,'Hs_WTIP.A':0.11498000000000008):0.02803,'Hs_LIMD1.A':0.13053000000000003):0.07550999999999997,'Dm_jub.A':0.062000000000000055):0.0,'Nv_132927.A':0.3962000000000001):0.26307999999999976):0.08328000000000024,('Hs_LPP-a.A':0.0369900000000003,'Hs_TRIP6.A':0.30146000000000006):0.17670999999999992):0.05780999999999992):0.02281000000000022):0.11011000000000015,'Aq_227874.A':0.49597000000000024):0.10437999999999992):0.05058999999999969):0.16746000000000016,('Co_02521T0.C':0.6243400000000001,('Co_00254T0.B':0.4196899999999997,('Co_06928T0.A':0.40863000000000005,('Co_00751T0.B':0.62243,'Co_07939T0.D':0.23416000000000015):0.1019000000000001):0.07987999999999973):0.0388200000000003):0.07974999999999977):0.0,((('Ml_093519b.C':0.22217999999999982,'Ml_04674a.C':0.26933000000000007):0.04627999999999988,(((('Ta_58696.B':0.4510700000000001,'Ta_28417.C':0.12250000000000005):0.13633999999999968,'Nv_164443.C':0.15585000000000004):0.041320000000000245,((('Hs_ABLIM2.C':0.10734000000000021,'Hs_ABLIM1-b.C':0.046040000000000525):0.048699999999999743,'Hs_ABLIM3.C':0.10963000000000012):0.06555,'Dm_unc-115.C':0.13582000000000027):0.0686):0.10082000000000013,((((('Aq_213282.A':0.4822899999999999,'Dm_LIMK1.A':0.15447999999999995):0.32036,'Hs_LIMK2-2a.A':0.2599100000000001):0.07664999999999988,('Nv_241192.A':0.6233900000000001,'Hs_LIMK1.A':0.17603999999999997):0.0):0.10663,(((('Ta_30944.A':0.2149000000000001,(('Nv_161808.A':0.01905000000000001,('Dm_tup.A':0.03801999999999994,('Hs_ISL1.A':0.020969999999999933,'Hs_ISL2.A':0.026739999999999986):0.015030000000000099):0.03584999999999994):0.04039999999999999,('Aq_230128.A':0.3046500000000001,'Ml_053012a.A':0.06867000000000001):0.09345000000000003):0.0686500000000001):0.25825999999999993,((('Dm_Lim3.A':0.16788000000000003,(('Ml_068131a.A':0.1595899999999999,('Hs_LHX3-a.A':0.06722000000000006,'Hs_LHX4.A':0.05932000000000004):0.03835999999999995):0.06695000000000007,('Ml_132520a.A':0.36396000000000006,'Aq_LHX3.A':0.06227000000000005):0.04783000000000004):0.0):0.08409,(('Co_07975T0.A':0.83975,'Aq_218857.A':0.06770999999999994):0.0611600000000001,(('Dm_Lim1.A':0.13685999999999998,('Hs_LHX1.A':0.015660000000000007,'Hs_LHX5.A':0.037269999999999914):0.03425999999999996):0.04136999999999991,('Nv_109857.A':0.10254000000000008,'Ta_30033.A':0.10829):0.05750000000000011):0.06858000000000009):0.023900000000000032):0.08085000000000009,(('Nv_246590.A':0.20536,('Hs_LHX6-1.A':0.12413999999999992,'Hs_LHX8.A':0.0321499999999999):0.3332900000000001):0.09238999999999997,((('Ml_RB056951.A':0.40280000000000005,('Ta_20649.A':0.19684999999999997,'Nv_95727.A':0.1652):0.003449999999999953):0.08099000000000012,('Dm_CG4328.A':0.31257,('Dm_CG32105.A':0.21486000000000005,('Hs_LMX1B.A':0.04560999999999993,'Hs_LMX1A.A':0.20771000000000006):0.15166999999999997):0.016839999999999966):0.09331):0.09115999999999991,'Dm_Awh.A':0.26339):0.0782799999999999):0.10057000000000005):0.10420000000000007):0.0,('Nv_15442.A':0.26629000000000014,(((('Nv_53046.A':0.31170999999999993,(('Nv_197606.A':0.0791900000000001,('Hs_LMO2-2.A':0.26569,('Hs_LMO1.A':0.9999999999999998,'Hs_LMO3.A':0.9999999999999998):0.0013199999999999878):0.05970999999999993):0.020990000000000064,'Dm_Bx.A':0.0777699999999999):0.009109999999999951):0.12670999999999988,('Dm_CG5708.A':0.23801000000000005,'Hs_LMO4.A':0.11291000000000007):0.055320000000000036):0.0,'Nv_170252.A':0.07547999999999999):0.06756999999999991,'Ta_16471.A':0.19974000000000003):0.17823999999999995):0.03370000000000006):0.0802900000000002,(('Ta_14836.A':0.34685999999999995,'Dm_ap.A':0.12161):0.13162000000000007,('Nv_98128.A':0.1771799999999999,('Hs_LHX9-2.A':0.03210000000000002,'Hs_LHX2.A':1.0):0.09855999999999998):0.10725000000000007):0.036430000000000184):0.1435299999999997):0.18314999999999992,((((('Nv_164443.A':0.5250100000000002,'Ta_28417.A':0.17182999999999993):0.27251000000000003,('Hs_ABLIM2.A':0.13449,('Hs_ABLIM3.A':0.18569999999999998,'Hs_ABLIM1-b.A':0.03699000000000008):0.0):0.12156999999999996):0.12813999999999992,'Dm_unc-115.A':0.27598999999999996):0.0537399999999999,'Aq_216587.A':0.15904000000000007):0.0899700000000001,('Ml_093519b.A':0.3778600000000001,'Ml_04674a.A':0.1717200000000001):0.09393999999999991):0.25244):0.0695800000000002):0.08794999999999975):0.05427000000000026,'Co_00929T0.D':0.4235100000000003):0.09473999999999982):0.020999999999999908,((((('Aq_217335.D':0.74129,'Co_04622T0.C':0.25767000000000007):0.01645999999999992,('Mb_38749.A':0.7899500000000002,'Sr_05818T0.A':1.0):0.67997):0.2762199999999999,(('Aq_217335.C':0.9351099999999999,'Dm_Lmpt.F':0.10562000000000005):0.04379000000000044,((('Hs_FHL5.E':0.2898999999999998,('Hs_FHL1-2.E':0.54942,'Hs_FHL2.E':0.014550000000000063):0.12486999999999981):0.17144000000000048,(('Aq_217335.F':0.8340000000000001,('Co_03950T0.A':0.38145000000000007,'Mb_31161.A':0.6258000000000001):0.06267):0.2639899999999997,('Co_06515T0.E':0.53975,'Nv_105385.F':0.39934000000000003):0.03506999999999971):0.07795000000000041):0.0,'Hs_FHL3.E':0.12448000000000015):0.04222999999999999):0.18813999999999975):0.08794000000000013,((('Co_04084T0.A':0.98638,'Mb_22420.C':1.0):0.39331000000000005,'Sr_03013T0.C':0.08234999999999992):0.23546000000000022,((('Hs_PRICKLE1.C':0.03149000000000002,((((('Dm_pk.C':0.033889999999999976,'Dm_esn.C':0.0233000000000001):0.08499999999999996,('Ta_26089.C':0.22675,(((('Nv_158093.C':1.0,'Nv_79983.B':1.0):0.0,'Nv_80146.A':1.0):0.3385100000000001,('Hs_TES-2.C':0.15664999999999996,'Dm_CG6522.C':0.43637999999999977):0.2717799999999999):0.16999999999999993,'Nv_79617.C':0.0678700000000001):0.05249999999999999):0.06509000000000009):0.007339999999999902,'Aq_217773.C':0.4701899999999999):0.1005100000000001,('Aq_225851.A':0.9251500000000001,'Hs_PRICKLE3.C':0.06008999999999998):0.04498000000000002):0.08956000000000008,'Hs_PRICKLE2.C':0.03289999999999993):0.09393999999999991):0.1626599999999998,(('Dm_Lmpt.D':0.14444000000000012,('Nv_105385.D':0.3617699999999999,('Hs_FHL1-2.C':0.32728999999999986,('Nv_177334.D':0.5937100000000002,('Hs_FHL3.C':0.23082000000000003,('Hs_FHL5.C':0.18655,'Hs_FHL2.C':0.09295999999999993):0.10282999999999998):0.0):0.11230000000000007):0.035290000000000044):0.11546999999999996):0.3758800000000002,('Ml_34571a.C':0.5017699999999998,(('Hs_FHL2.B':0.01654,('Hs_FHL5.B':0.09217999999999993,('Hs_FHL3.B':0.2726900000000001,('Nv_177334.C':0.37019000000000024,(('Nv_51061.C':1.0,'Nv_105385.C':0.07364000000000015):0.6026500000000001,'Hs_FHL1-2.B':0.2578800000000001):5.599999999998939E-4):0.06833):0.06502999999999992):0.0874299999999999):0.07119000000000009,'Dm_Lmpt.C':0.2244299999999999):0.1391899999999997):0.061970000000000525):0.0758599999999996):0.0950000000000002,('Ml_148516b.C':0.63402,'Ml_218921a.C':0.26388999999999996):0.1877399999999998):0.1906500000000002):0.03970999999999991):0.2595399999999999,(('Aq_216587.C':0.4804999999999997,'Hs_FBLIM1-c.A':0.2213099999999999):0.09188000000000018,(('Co_06515T0.D':0.5151700000000003,'Aq_217763.C':0.12602000000000046):0.16827999999999976,('Nv_239144.C':0.21586000000000016,('Ml_108023a.C':0.47492,('Dm_Tungus.D':0.10703999999999958,(('Co_02521T0.D':0.7894699999999999,'Ta_58345.C':1.0000000000000002):0.36393999999999993,('Hs_LDB3-2.C':0.014960000000000084,('Hs_PDLIM5-b.C':0.10240000000000005,'Hs_PDLIM7-2.C':0.1123400000000001):0.05225999999999997):0.11834000000000011):0.15548999999999968):0.2886200000000003):0.008680000000000021):0.06850999999999985):0.1446200000000002):0.10893999999999959):0.0):0.0):0.06411999999999995):0.07441000000000031):0.0,(((('Aq_217335.E':0.37205999999999984,'Co_04622T0.E':0.3026):0.04750000000000032,('Ta_58696.A':0.4562900000000001,'Co_03021T0.A':0.26851):0.2603500000000003):0.1896899999999997,((('Co_03477T0.C':0.9319,'Co_06515T0.C':0.15822000000000003):0.32026999999999983,'Co_07939T0.C':0.49907999999999975):0.07378000000000018,('Co_04110T0.D':0.5123899999999999,(((('Co_04083T0.C':0.3559000000000001,('Ml_12076b.C':0.4845900000000003,('Dm_stck.C':0.26780000000000004,(('Ta_18460.C':0.46965999999999997,('Aq_215055.C':0.32495000000000007,'Nv_160257.C':0.29237):0.017819999999999947):0.10776999999999992,('Ml_128211a.C':0.3960299999999999,(('Hs_LIMS1-b.C':1.0,('Hs_LIMS3.C':0.016680000000000028,'Hs_LIMS3.C-b':1.0):0.0):0.0,'Hs_LIMS2-1.C':0.12209000000000003):0.09840000000000004):0.11858999999999997):0.0):0.17844000000000015):0.16586999999999996):0.22438000000000002,(('Co_07939T0.A':0.3366800000000003,'Co_03477T0.A':0.30247000000000046):0.0,'Co_00929T0.A':0.7380200000000001):0.049290000000000056):0.034399999999999764,'Aq_225851.B':0.90737):0.02951999999999977,(('Ml_223524b.A':1.0953600000000003,'Nv_110149.B':1.0):0.17745999999999995,(('Hs_TRIP6.B':0.07249999999999979,(((('Ml_11321a.B':0.34684000000000004,('Aq_227874.B':0.38754,(('Dm_jub.B':0.045479999999999965,('Hs_WTIP.B':0.03486000000000011,'Hs_LIMD1.B':0.07068999999999992):0.026510000000000034):0.051770000000000094,'Hs_JUB-1.B':0.08654000000000006):0.07153999999999994):0.023940000000000072):0.0769200000000001,'Nv_132927.B':0.37668999999999997):0.14172000000000007,'Dm_Zyx102EF.B':0.08709999999999996):0.05881999999999987,'Hs_LPP-a.B':0.11252999999999957):0.045860000000000234):0.030999999999999694,('Hs_FBLIM1-c.B':0.6174400000000002,'Hs_ZYX.B':0.11681000000000008):0.1403099999999995):0.0694600000000003):0.3054699999999997):0.016210000000000058):0.0519400000000001):0.06451999999999991):0.0481600000000002,'Co_05072T0.B':0.3469700000000002):0.06594999999999995):0.018990000000000062,('Sr_08126T0.A':0.0851200000000003,'Mb_19246.A':0.3641500000000004):0.42242999999999986):0.012319999999999887):0.0016799999999999038,((((((('Nv_104924.A':0.10681999999999992,(('Hs_LPXN-2.A':0.21577000000000002,(('Co_07046T0.B':1.0,'Co_07046T1.B':1.0):0.50983,'Hs_PXN-3.A':0.9999999999999998):0.022720000000000073):0.05602000000000018,('Ml_001118a.A':0.22597999999999985,'Dm_Pax.A':0.07773999999999992):0.024920000000000275):0.08122999999999969):0.04281000000000024,'Co_06505T0.A':0.1249100000000003):0.055709999999999926,((((('Ml_12076b.D':0.37136999999999976,('Ml_128211a.D':0.06676000000000037,((('Ta_18460.D':0.21525000000000016,'Nv_160257.D':0.044070000000000054):0.025450000000000195,(('Dm_stck.D':0.053469999999999906,'Hs_LIMS2-1.D':0.9999999999999998):0.010580000000000034,'Hs_LIMS1-b.D':0.00941999999999954):0.015260000000000495):0.07548999999999984,'Aq_215055.D':0.14688999999999997):0.14326000000000016):0.02613999999999983):0.08084999999999987,'Co_04083T0.D':0.12301999999999991):0.16224000000000016,('Co_04110T0.A':0.42381999999999964,((('Co_03826T0.A':0.5012300000000001,'Co_00254T0.A':0.4161999999999999):0.09301000000000004,'Co_08582T0.A':0.24750000000000005):0.047800000000000065,('Co_07046T1.A':1.0000000000000002,'Co_07046T0.A':1.0000000000000002):0.30905000000000005):0.026929999999999676):0.17957):0.023230000000000306,(((('Hs_LDB3-2.B':0.047809999999999686,('Hs_PDLIM7-2.B':0.17808999999999964,'Hs_PDLIM5-b.B':0.15809999999999969):0.06189):0.16231000000000018,'Dm_Tungus.C':0.4163599999999996):0.14131000000000027,((('Co_08582T0.D':0.4684999999999997,'Ml_001118a.B':0.2162999999999995):0.10698000000000008,(('Co_04083T0.A':0.43015000000000003,((('Ml_12076b.A-b':0.42286,('Ml_12076b.A-a':0.7465000000000002,'Ml_128211a.A':0.07406000000000001):0.03703999999999996):0.04821999999999993,(('Ta_18460.A':0.26757999999999993,('Dm_stck.A':0.11756999999999995,('Hs_LIMS2-1.A':0.06842999999999999,('Hs_LIMS1-b.A':1.0,('Hs_LIMS3.A':0.9999999999999998,'Hs_LIMS3.A-c':0.9999999999999998):0.009660000000000002):0.026960000000000095):0.06309000000000009):0.10047000000000006):0.0,'Nv_160257.A':0.15894000000000008):0.04797999999999991):0.06795000000000018,'Aq_215055.A':0.18664000000000014):0.13256999999999985):0.4887199999999998,('Sr_10035T0.C':0.6284800000000001,('Dm_CG34325.B':0.28064,('Dm_CG31988.B':1.0,'Dm_CG31624.B':0.0548099999999998):0.11712999999999996):0.0):0.14517999999999986):0.05232999999999999):0.0,('Ml_001118a.C':0.19479999999999986,('Co_06505T0.C':0.09287000000000001,((('Co_07046T0.D':1.0,'Co_07046T1.D':1.0):0.23748000000000014,('Co_04110T0.C':0.4878800000000001,'Aq_224218.C':0.27071000000000023):0.0):0.11601999999999979,((('Hs_TGFB1I1-2.C':0.12288999999999994,('Hs_LPXN-2.C':0.17311000000000032,'Hs_PXN-3.C':0.07268000000000008):0.0636599999999996):0.07472000000000012,(('Sr_08126T0.C':0.42342999999999975,('Co_00751T0.C':0.26546000000000003,'Mb_19246.C':0.46556):0.07325999999999988):0.14598000000000022,'Nv_104924.C':0.005959999999999965):0.12280999999999986):0.03269000000000011,((('Co_00254T0.C':0.37478999999999996,('Ta_20314.A':1.9106100000000001,('Aq_229171.B':0.34467000000000003,'Co_03950T0.B':0.33129999999999993):0.03428000000000009):0.19379999999999997):0.15811999999999982,'Dm_Pax.C-d':0.08346999999999971):0.10537000000000019,('Ta_13161.C':0.3406100000000003,'Dm_Pax.C':1.0):0.016589999999999883):0.03971999999999998):0.05484):0.05913000000000013):0.06328999999999985):0.15047999999999995):0.015430000000000277):0.019129999999999647,(('Hs_TGFB1I1-2.B':0.28566,('Dm_Pax.B':0.059539999999999704,(('Hs_LPXN-2.B':0.19448,('Aq_224218.B':0.1895100000000003,'Hs_PXN-3.B':0.050690000000000346):0.02059999999999995):0.041589999999999794,'Nv_104924.B':0.1271099999999996):0.0):0.012860000000000316):0.05709999999999971,'Co_06505T0.B':0.17071000000000014):0.16721999999999992):0.02819000000000038):0.030269999999999797,('Co_02521T0.A':0.4767800000000002,'Co_00751T0.A':0.2942):0.23261999999999983):0.0):0.03561000000000014,('Aq_224218.A':0.23636999999999997,('Ta_58345.A':0.40157,'Ta_13161.A':0.21870000000000012):0.0780700000000003):0.0):0.01607999999999965,((('Co_04083T0.B':0.033039999999999736,((('Hs_LIMS2-1.B':0.04283999999999999,('Hs_LIMS3.B-b':0.02584999999999993,('Hs_LIMS3.B':1.0000000000000002,'Hs_LIMS1-b.B':1.0000000000000002):0.0):0.06614999999999993):0.07679999999999976,(('Aq_215055.B':0.21270999999999995,'Dm_stck.B':0.11651999999999996):0.057679999999999954,('Nv_160257.B':0.10030000000000006,'Ta_18460.B':0.14467999999999992):0.020869999999999944):0.06773999999999969):0.17676000000000025,('Ml_128211a.B':0.3369300000000002,'Ml_12076b.B':0.4721200000000003):0.04674999999999985):0.1707399999999999):0.32131,(('Hs_TGFB1I1-2.D':0.19029000000000007,('Hs_LPXN-2.D':0.09970999999999997,('Aq_224218.D':0.11880999999999986,('Hs_PXN-3.D':0.03049999999999997,((('Ta_13161.D':0.2315100000000001,'Co_06505T0.D':0.09996999999999989):0.0390299999999999,'Nv_104924.D':0.016359999999999708):0.017000000000000348,('Ml_001118a.D':0.1680400000000004,'Dm_Pax.D':0.021940000000000293):0.045889999999999986):0.023239999999999927):0.01855999999999991):0.02970000000000006):0.06572999999999984):0.15627999999999975,('Sr_08126T0.D':0.10541,'Mb_19246.D':0.2402899999999999):0.08512999999999993):0.015470000000000095):0.10423000000000027,('Ml_108023b.B':0.4010600000000002,('Nv_239144.B':0.24624999999999986,'Ta_58345.B':0.2547699999999997):0.0):0.08618000000000015):0.10772999999999966):0.023470000000000102,'Hs_TGFB1I1-2.A':0.2668599999999999):0.0,(('Aq_211654.A':0.9222900000000003,('Co_07046T0.E':1.0,'Co_07046T1.E':1.0):0.16759000000000013):0.26617999999999986,((('Dm_CG31988.A':1.0,'Dm_CG31624.A':1.0):0.13563999999999998,'Dm_CG34325.A':0.21547000000000027):0.1575899999999999,'Dm_CG30178.A':0.6485099999999999):0.2066300000000001):0.09367999999999999):0.025090000000000057);
