# Supplementary material for: The Diversification of the LIM Superclass at the Base of the Metazoa Increased Subcellular Complexity and Promoted Multicellular Specialization
Source: PLoS One. 2012 Mar 15;7(3):e33261. doi: 10.1371/journal.pone.0033261 (PMC3305314; doi:10.1371/journal.pone.0033261)
Supplement: Figure S5 — Human LIM domain tree in Newick format. Newick version of Figure S4. This file can be opened and manipulated in tree-viewing software like Figtree or Treeview. (TRE) [file pone.0033261.s005.tre]

('Hs_LIMK2-2a.B':0.44226,(((('Hs_LIMCH1-b.A':0.28917,'Hs_LMO7-1.A':0.20988):0.29637,'Hs_ZNF185-4.A':1.05896):0.30572,(('Hs_FBLIM1-c.C':0.15469,(('Hs_TRIP6.C':0.14662,'Hs_ZYX.C':0.26555):0.0232,('Hs_LPP-a.C':0.08959,(('Hs_LIMD1.C':0.11351,'Hs_WTIP.C':0.17783):0.0,'Hs_JUB-1.C':0.21107):0.27744):0.02235):0.32731):0.9512,((((('Hs_NRAP-C.A':0.2115,('Hs_NEBL-2.A':0.03729,'Hs_LASP1.A':0.04202):0.1286):0.32745,(((('Hs_LIMD2.A':0.1199,('Hs_LIMA1-c.A':0.1362,'Hs_XIRP2-2.A':0.08441):0.05954):0.35961,('Hs_MICAL3-1.A':0.09148,'Hs_MICAL2.A':0.2396):0.14917):0.1487,('Hs_MICALL1.A':0.25336,'Hs_MICALL2-1.A':0.1398):0.37662):0.0,'Hs_MICAL1-1.A':0.39532):0.52933):0.10911,((('Hs_CRIP3.A':0.12123,'Hs_CSRP2.A':0.15133):0.0392,('Hs_CRIP3.B':0.02524,'Hs_CRIP1.A':0.17043):0.0514):0.07178,'Hs_CSRP2.B':0.11276):0.24207):0.29183,('Hs_CSRP3.2.B':0.04393,('Hs_CRIP2.B':0.08724,'Hs_CSRP1-1.B':0.07908):0.08841):0.16417):0.14369,(('Hs_CSRP1-1.A':0.03839,'Hs_CRIP2.A':0.10738):0.09257,'Hs_CSRP3.2.A':0.11387):0.15077):0.4252):0.1231):0.19951,((((((((((('Hs_LIMS3.C':0.02238,'Hs_LIMS3.C-b':0.0):0.0,'Hs_LIMS1-b.C':0.0):0.0,'Hs_LIMS2-1.C':0.15968):1.13897,'Hs_PDLIM7-2.A':0.02739):0.41002,('Hs_LDB3-2.A':0.13355,'Hs_PDLIM5-b.A':0.18428):0.12124):0.49252,(((((('Hs_LPXN-2.B':0.14394,'Hs_PXN-3.B':0.17899):0.17291,'Hs_TGFB1I1-2.B':0.25899):0.25291,('Hs_LDB3-2.B':0.05402,('Hs_PDLIM7-2.B':0.25124,'Hs_PDLIM5-b.B':0.19109):0.09401):0.46013):0.04007,('Hs_LIMS1-b.D':0.0,'Hs_LIMS2-1.D':0.02624):0.46792):0.02887,('Hs_LPXN-2.A':0.23688,'Hs_PXN-3.A':0.06319):0.10662):0.04539,('Hs_TGFB1I1-2.D':0.24328,('Hs_PXN-3.D':0.08613,'Hs_LPXN-2.D':0.13649):0.10723):0.49784):0.0):0.04355,'Hs_TGFB1I1-2.A':0.265):0.04306,((('Hs_ABLIM3.B':0.35551,('Hs_ABLIM1-b.B':0.19636,'Hs_ABLIM2.B':0.07783):0.09075):0.18997,('Hs_ABLIM3.D':0.0,('Hs_ABLIM2.D':0.11125,'Hs_ABLIM1-b.D':0.12962):0.11146):0.97883):0.27217,(('Hs_LIMS1-b.E':0.01223,('Hs_LIMS2-1.E':0.0118,'Hs_LIMS2-2.E':0.01123):0.07338):0.61839,(('Hs_LIMS2-1.B':0.14127,('Hs_LIMS1-b.B':0.0,'Hs_LIMS3.B':0.0):0.0):0.0,'Hs_LIMS3.B-b':0.03377):0.82685):0.03924):0.34421):0.0603,(((('Hs_FHL3.D':0.2559,(('Hs_FHL5.D':0.41053,'Hs_FHL2.D':0.16329):0.0641,'Hs_FHL1-2.D':0.26595):0.03318):0.37876,(('Hs_TES-2.C':0.80832,((('Hs_FHL2.B':0.0268,(('Hs_FHL1-2.B':0.38324,'Hs_FHL3.B':0.32247):0.14181,'Hs_FHL5.B':0.0999):0.13195):0.26929,('Hs_FHL1-2.E':0.39112,('Hs_FHL2.E':0.10579,('Hs_FHL3.E':0.41675,'Hs_FHL5.E':0.37067):0.10775):0.32559):0.55601):0.2303,(('Hs_PRICKLE2.C':0.03777,'Hs_PRICKLE1.C':0.16553):0.05292,'Hs_PRICKLE3.C':0.19967):0.24493):0.09033):0.45186,('Hs_FHL3.C':0.25438,('Hs_FHL1-2.C':0.59716,('Hs_FHL2.C':0.12022,'Hs_FHL5.C':0.2507):0.09922):0.09713):0.15496):0.23296):0.07631,((('Hs_PRICKLE3.B':0.12524,(('Hs_LMCD1.B':0.77481,'Hs_TES-2.B':0.19525):0.37852,('Hs_PRICKLE1.B':0.05789,'Hs_PRICKLE2.B':0.01488):0.02892):0.07425):0.19664,'Hs_PRICKLE4.B':0.40376):0.0,('Hs_FHL5.A':0.14752,('Hs_FHL2.A':0.15291,'Hs_FHL3.A':0.40481):0.20942):0.50033):0.53918):0.24949,(('Hs_PDLIM5-b.C':0.0,('Hs_PDLIM7-2.C':0.14914,'Hs_LDB3-2.C':0.08515):0.13473):0.81525,((('Hs_ABLIM1-b.C':0.03112,('Hs_ABLIM2.C':0.12084,'Hs_ABLIM3.C':0.20682):0.0542):0.39938,((('Hs_LHX9-2.A':0.04166,'Hs_LHX2.A':0.0):0.28709,((((('Hs_LMX1A.A':0.16479,'Hs_LMX1B.A':0.17527):0.5619,('Hs_LHX1.A':0.06957,'Hs_LHX5.A':0.0):0.04319):0.15731,('Hs_LHX3-a.A':0.07406,'Hs_LHX4.A':0.09759):0.21876):0.13931,('Hs_LHX6-1.A':0.11312,'Hs_LHX8.A':0.09222):0.53308):0.06034,(('Hs_LMO4.A':0.11802,(('Hs_LMO1.A':0.0,'Hs_LMO3.A':0.0):0.02915,'Hs_LMO2-2.A':0.32935):0.23318):0.36567,('Hs_ISL1.A':0.0,'Hs_ISL2.A':0.06157):0.54715):0.07314):0.0):0.38684,('Hs_LIMK1.A':0.20339,'Hs_LIMK2-2a.A':0.5098):0.06088):0.24617):0.3265,(('Hs_LMCD1.A':0.07129,('Hs_TES-2.A':0.22868,(('Hs_PRICKLE3.A':0.14904,('Hs_PRICKLE4.A':0.45759,'HsPRICKLE2.A':0.0):0.0335):0.01017,'Hs_PRICKLE1.A':0.059):0.28033):0.15867):0.84866,('Hs_TGFB1I1-2.C':0.24153,('Hs_PXN-3.C':0.07984,'Hs_LPXN-2.C':0.24586):0.02476):0.33999):0.07152):0.06899):0.09135):0.02313):0.15935,('Hs_FBLIM1-c.A':0.3065,('Hs_ZYX.A':0.30587,('Hs_LPP-a.A':0.30826,'Hs_TRIP6.A':0.12741):0.41796):0.34385):0.1911):0.12471,(('Hs_FBLIM1-c.B':0.65951,(((('Hs_LIMD1.B':0.08263,'Hs_WTIP.B':0.05818):0.06224,'Hs_JUB-1.B':0.1087):0.3804,'Hs_TRIP6.B':0.13188):0.07077,('Hs_LPP-a.B':0.12947,'Hs_ZYX.B':0.28202):0.08278):0.2306):0.23205,((('Hs_LIMD1.A':0.15809,('Hs_WTIP.A':0.13416,'Hs_JUB-1.A':0.215):0.03643):0.24105,('Hs_PDLIM4-1.A':0.06364,(('Hs_PDLIM2-2.A':0.39499,'Hs_PDLIM1.A':0.12618):0.13712,'Hs_PDLIM3-b.A':0.03765):0.22653):0.68301):0.25171,((('Hs_LIMS2-1.A':0.12529,'Hs_LIMS1-b.A':0.0):0.01274,('Hs_LIMS3.A-c':0.0,'Hs_LIMS3.A':0.0):0.0):1.17723,('Hs_LMO4.B':0.17315,((('Hs_LMO2-2.B':0.47867,('Hs_LMO3.B':0.0,'Hs_LMO1.B':0.02371):0.07837):0.25693,((('Hs_ISL1.B':0.23474,'Hs_ISL2.B':0.0):0.27834,(('Hs_LHX2.B':0.06277,'Hs_LHX9-2.B':0.0):0.1477,('Hs_LHX6-1.B':0.03378,'Hs_LHX8.B':0.08727):0.4253):0.07905):0.11077,(('Hs_LMX1A.B':0.04957,'Hs_LMX1B.B':0.08258):0.32109,(('Hs_LHX3-a.B':0.04022,'Hs_LHX4.B':0.04736):0.11899,('Hs_LHX5.B':0.0386,'Hs_LHX1.B':0.00908):0.35696):0.14035):0.03498):0.09047):0.04832,('Hs_ABLIM3.A':0.18244,('Hs_ABLIM1-b.A':0.05165,'Hs_ABLIM2.A':0.18061):0.06423):0.84791):0.16412):0.2075):0.14621):0.17346):0.09125):0.0):1.21862,'Hs_LIMK1.B':0.0);
