# Supplementary material for: The Diversification of the LIM Superclass at the Base of the Metazoa Increased Subcellular Complexity and Promoted Multicellular Specialization
Source: PubMed Central journal article supplement (PMC3305314; doi:10.1371/journal.pone.0033261), 2012-03-15

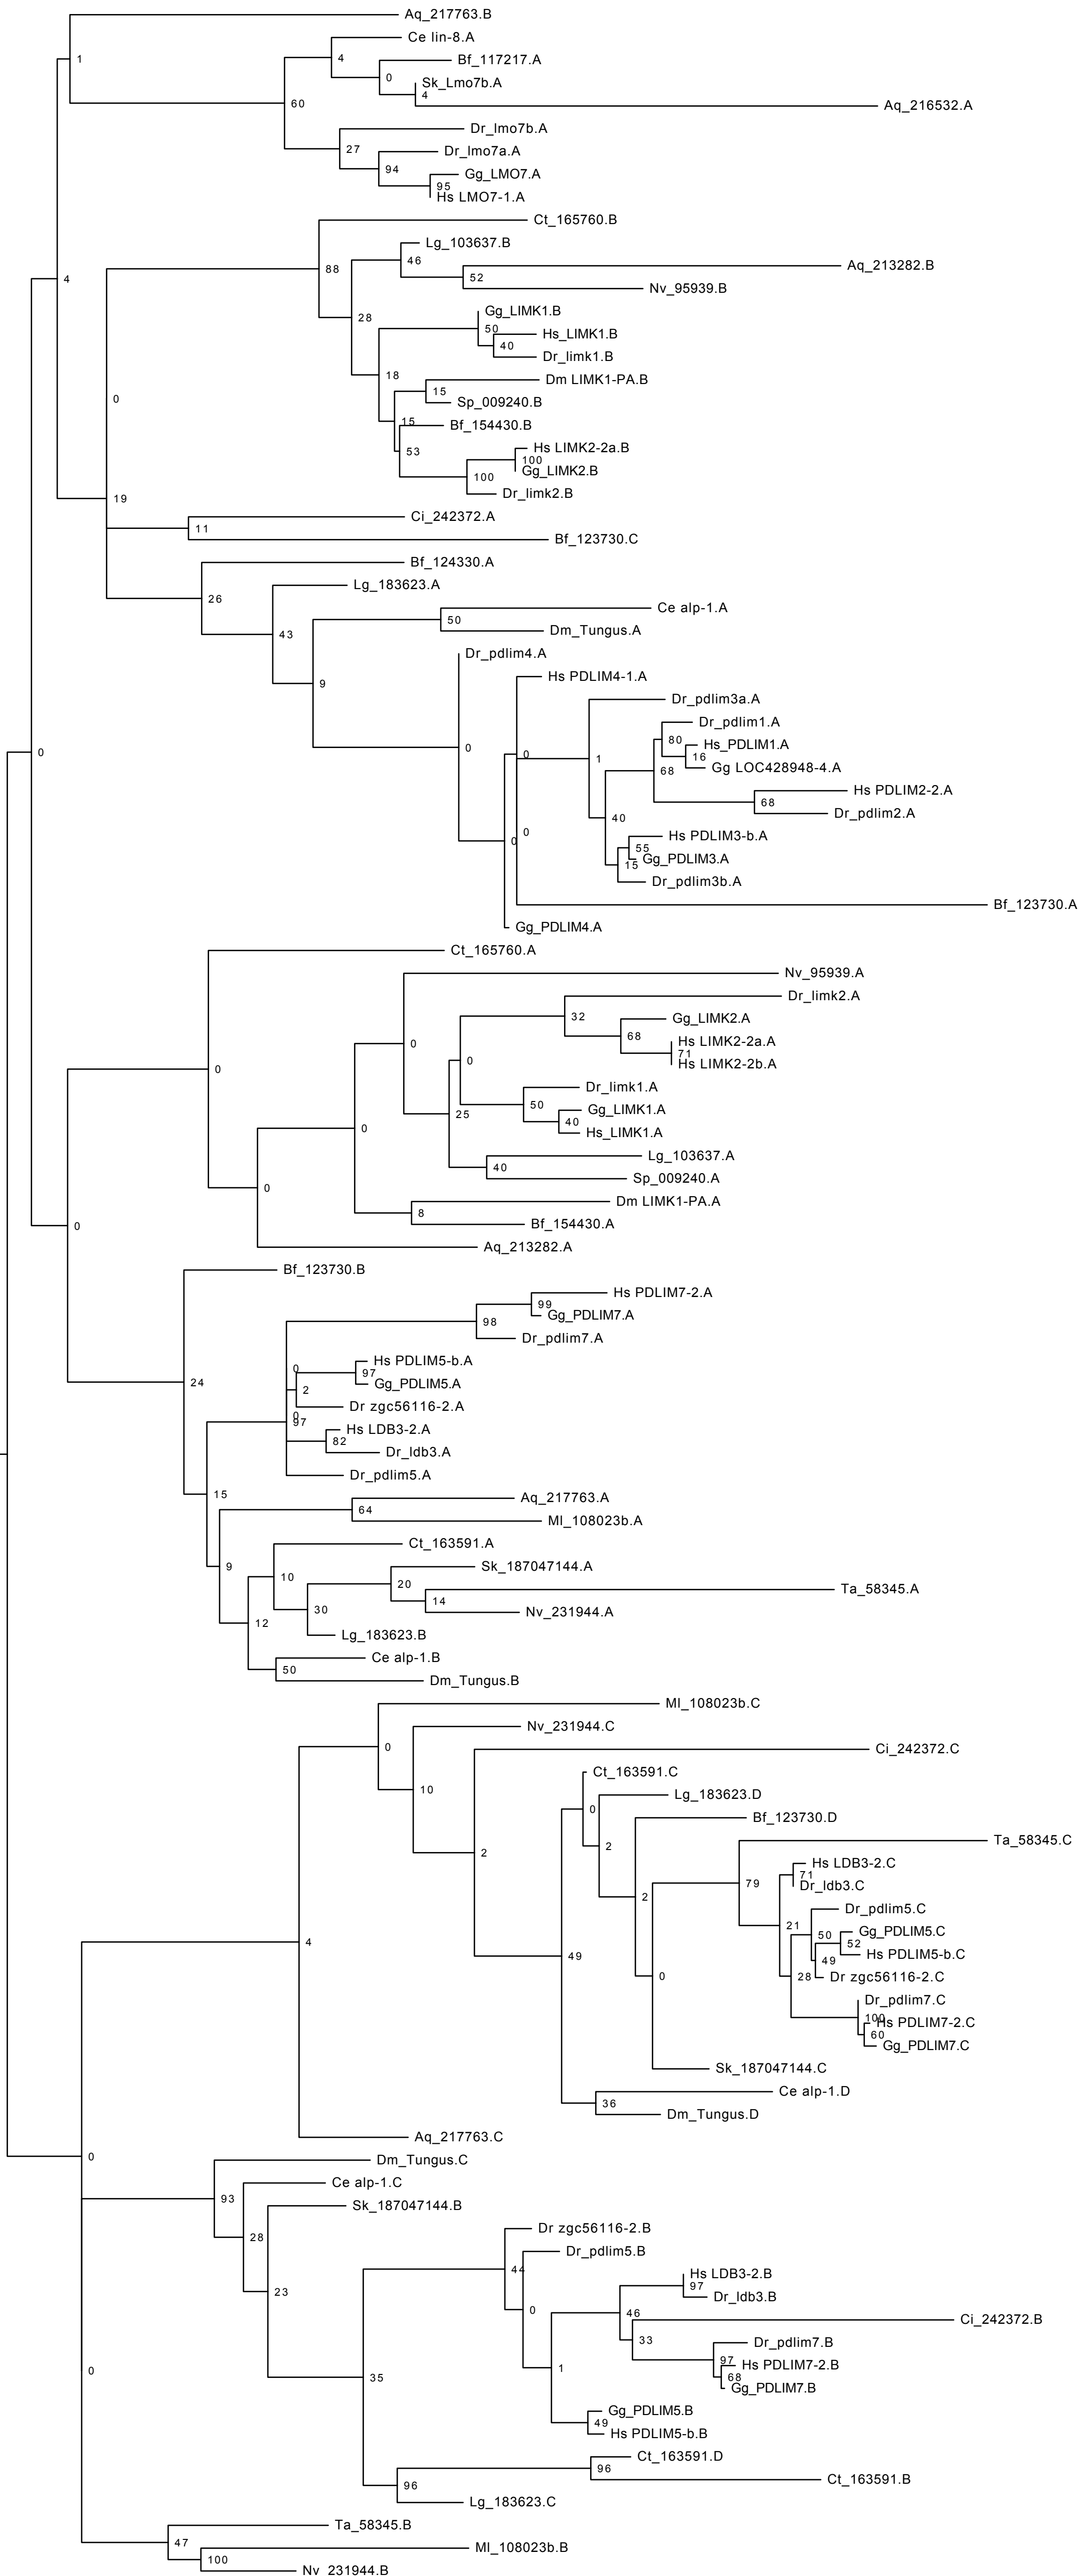

Supplement: pone.0033261.s007.pdf [file pone.0033261.s007.pdf]
