# Supplementary material for: The Diversification of the LIM Superclass at the Base of the Metazoa Increased Subcellular Complexity and Promoted Multicellular Specialization
Source: PLoS One. 2012 Mar 15;7(3):e33261. doi: 10.1371/journal.pone.0033261 (PMC3305314; doi:10.1371/journal.pone.0033261)
Supplement: Table S1 — Classification of LIM proteins. Species, accession numbers, and domain architectures are provided for each LIM protein in our analysis. Blue and grey columns indicate the amino acid position of a particular domain or motif as well as the E-Value from hmmsearch, in the case of domains, and MEME, in the case of motifs. Blank blue and grey columns indicate that the particular domain or motif was not found. A single asterisk indicates a feature that was not identified in the original protein sequence, but is present in alternative protein models. A note at the end of the row describes the alternative model associated with the asterisk. A double asterisk refers to a class-level note listed at the top of the class. Domains in red indicate domains that are not typical of the class. (XLS) [file pone.0033261.s010.xls]

## Sheet: Sheet1
ABLIM Class
(LIM---LIM-----LIM---LIM------------VHP)
Species	Gene ID	Tree Symbol	LIM Domain A		LIM Domain B		LIM Domain C		LIM Domain D		VHP Domain
Amphimedon queenslandica	Aqu1.216587|PACid:15715115	Aq_216587	5	1.5e-10	64	8.7e-12	250†	1.1e-09	309	0.00012	477	1.8e-14
Drosophila melanogaster	FBpp0081570	Dm_unc-115	8	8e-11	67	1e-11	173	4e-13	232	9.3e-06	771	2e-12
Homo sapiens	gi|51173713|ref|NP_001003407.1|	Hs_ABLIM1-b	39	4.2e-10	98	1.3e-10	166	4.8e-15	225	7.2e-07	683	1.3e-16
Homo sapiens	gi|115333979|gb|AAI22568.1|	Hs_ABLIM2	24	2.4e-09	83	1.7e-10	153	6.8e-15	212	1e-06	486	1.8e-17
Homo sapiens	gi|7662330|ref|NP_055760.1|	Hs_ABLIM3	23	7.6e-09	82	2.2e-09	151	1e-14	210	1.2e-07	648	5.7e-18
Mnemiopsis leidyi	ML04674a, GENBANK: JN615192	Ml_04674a	9	2.4e-12	69	1.4e-08	133†	1.3e-15	191	1.4e-07
Mnemiopsis leidyi	ML093519b, GENBANK: JN615193	Ml_093519b	15	2.5e-10	75	8.4e-10	142	6.1e-13	200	2.9e-06	659	1.8e-14
Nematostella vectensis	jgi|Nemve1|164443|estExt_gwp.C_500143	Nv_164443	7	6.8e-10	66	1.5e-07	150	3.6e-14	209	1.2e-07	*		*VHP found in alternative model jgi|Nemve1|232479|fgsh_est.C_scaffold_50000004, but interrupted by retrotransposon domains inbetween LIMs and VHP
Trichoplax adhaerens	jgi|Triad1|28417|e_gw1.8.328.1	Ta_28417	18	1.4e-08	77	2.3	140	7.7e-14	199	7.6e-06
Trichoplax adhaerens	jgi|Triad1|58696|fgeneshTA2_pg.C_scaffold_8000244	Ta_58696			127	1.7	190	1.3e-12	249	4.6e-05
CRP Class
(---CRP--CMA---(CRP---CMA))			*No e-value given because motif discovered with alternative methods
Species	Gene ID	Tree Symbol	LIM Domain A		CRP Motif A (Glycine-rich)		LIM Domain B		CRP Motif A (Glycine-rich)
Amphimedon queenslandica	Aqu1.222999|PACid:15721527	Aq_222999	10	1.2e-11			92*	5.2e-17	149	4.73e-09	In Fig. S1-3, a duplicate sequence for this LIM domain is included as Aq_223000 (Aqu1.223000|PACid:15721528/44-100)
Amphimedon queenslandica	Aqu1.223455|PACid:15721983	Aq_223455	5	4.6e-16	63	6.86e-15
Capsaspora owczarzaki	CAOG_02875T0	Co_02875T0	6	9.1e-14	63	*	115	2.4e-13	172	*
Capsaspora owczarzaki	CAOG_07516T0	Co_07516T0	5	6.2e-12	86	*
Drosophila melanogaster	FBpp0288975	Dm_Mlp60A	11	4.9e-12	68	1.68e-16	108	5.2e-11			LIM	213	5.3e-11	LIM	316	2.8e-10	CRP Motif A	374	*	LIM	412	2.8e-09
Drosophila melanogaster	FBpp0081133	Dm_Mlp84B	12	1.2e-12	69	1.66e-14	120	1.5e-11	178	*	LIM	222	3.1e-10	LIM	325	8.2e-09	LIM	421	3.4e-10	CRP Motif A	470	*
Homo sapiens	gi|4503047|ref|NP_001302.1|	Hs_CRIP1	4	1.5e-16	62	6.14e-14
Homo sapiens	gi|4503049|ref|NP_001303.1|	Hs_CRIP2	5	3.2e-13	63	1.54e-11	126	5.5e-15	184	*
Homo sapiens	gi|116517305|ref|NP_996805.2|	Hs_CRIP3	5	1.2e-12	63	3.13e-11	124	7.8e-14	182	*
Homo sapiens	gi|4758086|ref|NP_004069.1|	Hs_CSRP1-1	10	1.8e-13	67	*	119	1.4e-16	176	*
Homo sapiens	gi|4503101|ref|NP_001312.1|	Hs_CSRP2	10	2.6e-13	67	*	119	2.9e-17	176	2.21e-14
Homo sapiens	gi|189083753|ref|NP_001121128.1|	Hs_CSRP3.2	10	2.3e-12	67	5.61e-14	120	2.7e-17
Mnemiopsis leidyi	ML02959a, GENBANK: JN615204	Ml_02959a	11	4e-15	68	*	111	3e-14	168	3.79e-12
Nematostella vectensis	jgi|Nemve1|108380|e_gw.90.94.1	Nv_108380	4	1.3e-13	62	1.02e-14
Nematostella vectensis	jgi|Nemve1|123146|e_gw.196.58.1	Nv_123146	21	1.4e-10	81	1.14e-13
Nematostella vectensis	jgi|Nemve1|132315|e_gw.308.37.1	Nv_132315	4	1.5e-13	62	5.72e-16
Nematostella vectensis	jgi|Nemve1|214299|fgenesh1_pg.scaffold_196000032	Nv_214299	4**	1.9e-12			88	2.2e-12	145	7.52e-17	**A duplicate sequence of this LIM is included in Fig. S1-3 as Nv_214299.A-2
Nematostella vectensis	jgi|Nemve1|247501|estExt_fgenesh1_pg.C_3080009	Nv_247501	4	3.3e-15	62	1.3e-16
Nematostella vectensis	jgi|Nemve1|52979|gw.135.117.1	Nv_52979	2	9.7e-16	59	1.48e-16	119	3.8e-14	176	*
Nematostella vectensis	jgi|Nemve1|78916|e_gw.1.633.1	Nv_78916	11**	9.7e-14	68	*					**A duplicate sequence of this LIM is included in Fig. S1-S3 as Nv_68197 (jgi|Nemve1|68197|gw.1.654.1/11-62)
ENIGMA Class
(PDZ----ZM--AM---LIM---LIM---LIM) (PDZ---ZM--AM---LIM------LIM---LIM---LIM) (PDZ---ZM---AM---LIM)			*No e-value given because detected using hmmsearch on high resolution settings
Species	Gene ID	Tree Symbol	Zasp Motif (ZM)		ALP Motif (AM)		PDZ Domain		LIM Domain A (Alp-like)		LIM Domain B (Enigma-like A)		LIM Domain C (Enigma-like B)		LIM Domain D (Enigma-like C)
Amphimedon queenslandica	Aqu1.217763|PACid:15716291	Aq_217763					8	4.9e-10			324	1.5e-13	383	3e-11	443	5.2e-14
Drosophila melanogaster	FBpp0086449	Dm_Tungus	151	9.6e-14			15	6.1e-12	282	1.5e-10	908	6.6e-08	969	1.5e-11	1028	4.8e-11	This gene model is isoform C. In Fig S1-3, alternative isoforms of LIM domains 1 and 2 are included as Dm_Tungus.A-e and Dm_Tungus B-i. These sequences come from isoforms E and I, respectively.
Homo sapiens	gi|122056614|ref|NP_001073583.1|	Hs_LDB3-2	148	6.4e-14	224	1.83e-14	9	2e-15			441	1.3e-10	500	1.5e-14	559	1.4e-12
Homo sapiens	gi|13994151|ref|NP_066272.1|	Hs_PDLIM1	138	7.3e-13	212	2.53e-10	5	2.8e-19	260	4.4e-10
Homo sapiens	gi|21361888|ref|NP_067643.2|	Hs_PDLIM2-2			218	*	9	1e-14	286	4.3e-09
Homo sapiens	gi|166235178|ref|NP_001107579.1|	Hs_PDLIM3-b	137	4.1e-14	201	7.89e-13	8	1.1e-15	246	3.5e-13
Homo sapiens	gi|19923181|ref|NP_003678.2|	Hs_PDLIM4-1			207	3.62e-12	9	1.1e-15	255	3.8e-15
Homo sapiens	gi|197383100|ref|NP_001011513.2|	Hs_PDLIM5-b			170	7.79e-14	10	1.8e-14			311	1.6e-11	370	1.2e-14	429	3.5e-12
Homo sapiens	gi|42741675|ref|NP_976227.1|	Hs_PDLIM7-2			129	7.42e-13	8	3.4e-12			248	3.3e-13	307	1.6e-14	366	1.1e-12
Mnemiopsis leidyi	ML108023b, GENBANK: JN615194	Ml_108023b			290	*	44	3.7e-09			586	3.1e-12	644	1.2e-10	701**	7.7e-12	**In Fig. S1-S3, the sequence of LIM Domain C is represented by an older gene model, ML108023a
Nematostella vectensis	jgi|Nemve1|231944|fgsh_est.C_scaffold_11000004	Nv_231944			244, 284	*,*	10	1.6e-13			416**	4.7e-14	853**	4.7e-10	902	1.6e-11	Tropmyosin	621	2e-14	**In Fig. S1-3, the sequence of LIM Domain B and LIM Domain C was taken from an alternative gene model Nv_85371
Trichoplax adhaerens	jgi|Triad1|27665|e_gw1.7.813.1	Ta_58345					96	0.23			429**	5e-14	488	1.4e-13	547	3.9e-12	**In Fig. S1-3, the sequence of LIM Domain B was taken from alternative gene model jgi|Triad1|27665|e_gw1.7.813.1.
EPLIN Class
(------------LIM-EM-------------)			*No e-value given because motif discovered with alternative methods
Species	Gene ID	Tree Symbol	LIM Domain A		Eplin Motif (EM)
Amphimedon queenslandica	Aqu1.213741|PACid:15712269	Aq_213741	351	4.3e-13	408	2.55e-23	Troponin	6	0.0074
Capsaspora owczarzaki	CAOG_07267T0	Co_07267T0	21	1.1e-12	78	1.2e-15
Drosophila melanogaster	FBpp0090950	Dm_CG33521	66	2.3e-09	105	*
Homo sapiens	gi|119372315|ref|NP_001073278.1|	Hs_XIRP2-2	402	2.4e-10	459	6.88e-23
Homo sapiens	gi|13386490|ref|NP_085053.1|	Hs_LIMD2	40	3.5e-12	97	8.93e-23
Homo sapiens	gi|165905591|ref|NP_001107019.1|	Hs_LIMA1-c	231	1.5e-12	288	1.75e-20
Monosiga brevicollis	jgi|Monbr1|16167|e_gw1.6.367.1	Mb_16167	1	7.9e-12	56	3.16e-21
Monosiga brevicollis	jgi|Monbr1|26577|fgenesh2_pg.scaffold_15000011	Mb_26577	1922	1.1e-12	1979	4.67e-17	cNMP_binding	154	1e-05	efhand	643	0.05
Monosiga brevicollis	jgi|Monbr1|3283|gw1.7.300.1	Mb_3283	1	5.1e-15	58	8.9e-25
Nematostella vectensis	jgi|Nemve1|79564|e_gw.1.381.1	Nv_79564	22	7.5e-14	79	7.92e-23
Salpingoeca rosetta	PTSG_09345T0	Sr_09345T0	859	6.1e-12	916	1.56e-23	SlyX	508	0.026
Trichoplax adhaerens	jgi|Triad1|9099|gw1.23.152.1	Ta_9099	5	1e-12	62	*
LASP Class
(-LIM--Neb(x?)--SH3-)
Species	Gene ID	Tree Symbol	LIM Domain A		Nebulin Repeat		SH3 Domain
Amphimedon queenslandica	Aqu1.224097|PACid:15722625	Aq_224097	5*	9.3e-13	67, 102	0.00048, 0.78	193	5.1e-13	*In Fig. S1-S3 Duplicate sequences Aqu1.224095|PACid:15722623/5-61 and Aqu1.224096|PACid:15722624/5-61 were included.
Capsaspora owczarzaki	CAOG_05568T0	Co_05568T0	5	1.9e-14	67	0.0097	186	0.00013
Drosophila melanogaster	FBpp0075109	Dm_Lasp	5	9.4e-12	67, 102	2.1e-09, 2.9e-06	449	2.9e-14
Homo sapiens	gi|5453710|ref|NP_006139.1|	Hs_LASP1	5	3.2e-13	67103	4.1e-09, 2.3e-09	208	2.8e-12
Homo sapiens	gi|47087157|ref|NP_998734.1|	Hs_NEBL-2	5	1.3e-12	67, 103,,139	4.6e-09, 2.20E-10, 1.50E-05	449	3e-14
Homo sapiens	gi|46049092|ref|NP_006166.3|	Hs_NRAP-C	6	8.2e-09	175, 209, 316, 458, 494, 529, 697, 732, 769, 809, 940, 1011, 1049, 1183, 1220, 1327, 1461, 1535, 1605	8.4e-09, 3e-05, 8.7e-07, 4.4e-08, 1.4e-09, 1.2e-09, 1.9e-07, 0.00011, 2e-06, 2.7e-05, 6.9e-05, 1.2e-05 , 4.3e-08, 9.5e-05, 1.6e-05, 8.9e-05, 0.00024, 4.4e-05, 3.7e-05, 4.2e-05
Mnemiopsis leidyi	ML038835b, GENBANK: JN615195	Ml_038835b	5	2.6e-14	67, 104	0.000084, 0.14
Monosiga brevicollis	jgi|Monbr1|34066|estExt_fgenesh2_pg.C_290075	Mb_34066	1121	1.6e-06	1165	0.0056	1273, 1382, 1457	6.3e-13 , 1.3e-12 , 3.7e-13	PH	784	4.4e-07
Nematostella vectensis	jgi|Nemve1|178184|estExt_GenewiseH_1.C_50530	Nv_178184	5	4.5e-12	67, 102	2.9e-07 , 0.97	156	6.4e-14
Nematostella vectensis	jgi|Nemve1|178189|estExt_GenewiseH_1.C_50535	Nv_178189	5	3.5e-12	67, 102	4.3e-08, 1.9e-06	177	1.8e-11
Nematostella vectensis	jgi|Nemve1|81835|e_gw.5.432.1	Nv_81835	5	7e-12	67, 102	7.20E-08, 3.60E-05	185	1.4e-15
Salpingoeca rosetta	PTSG_06072T0	Sr_06072T0	11	4.3e-14	73	0.007	182279	1.8e-14 , 3.2e-11
LHX Class
(---LIM---LIM---HBX)
Species	Gene ID	Tree Symbol	LHX Motif A		LHX Motif B		LHX Motif C		LIM Domain A		LIM Domain B		Homeodomain
Amphimedon queenslandica	Aqu1.218857|PACid:15717385	Aq_218857							6	9e-16	65	7e-14	206	1.8e-19
Amphimedon queenslandica	Aqu1.230128|PACid:15728656	Aq_230128							45	8.8e-12	108	1.7e-14	230	1.5e-15
Amphimedon queenslandica	Aqgi|167859587|gb|ACA04748.1|	Aq_LHX3							93	1.2e-15	152	1.6e-18	219	1.6e-19
Drosophila melanogaster	FBpp0289731	Dm_ap							147	4.8e-17	209	1.3e-15	367	2.5e-19
Drosophila melanogaster	FBpp0073013	Dm_Awh							8	2.3e-13	69	8.1e-15	149	4.6e-19
Drosophila melanogaster	FBpp0075685	Dm_CG32105					622	1.92e-18	275	6.2e-12	334	1.2e-09	425	6.5e-18
Drosophila melanogaster	FBpp0290293	Dm_CG4328					511	1.63e-19	199	9.6e-10	259	1.6e-12	342	2.6e-15
Drosophila melanogaster	FBpp0071216	Dm_Lim1							27	1.9e-15	86	7.6e-16	248	1.4e-19
Drosophila melanogaster	FBpp0080713	Dm_Lim3	234	1.18e-17					42	2.1e-14	101	5.8e-17	177	1e-20
Drosophila melanogaster	FBpp0080662	Dm_tup			352	5.56e-18			54	9e-16	116	9.7e-14	243	2.5e-14	Unclassified Motif B	301	7.88e-41
Homo sapiens	gi|115387114|ref|NP_002193.2|	Hs_ISL1			291	5.96e-27			17	3.9e-15	79	8.9e-14	183	6.6e-15	Unclassified Motif B	240	1.09e-56
Homo sapiens	gi|21956641|ref|NP_665804.1|	Hs_ISL2			301	5.96e-27			27	3.6e-15	89	6e-16	193	6.9e-15	Unclassifed Motif B	250	2.21e-50
Homo sapiens	gi|30410785|ref|NP_005559.2|	Hs_LHX1							4	1.1e-14	63	1.3e-17	181	7.8e-20
Homo sapiens	gi|30795196|ref|NP_004780.3|	Hs_LHX2							53	4.6e-16	115	8.8e-16	267	5.4e-19
Homo sapiens	gi|30023847|ref|NP_835258.1|	Hs_LHX3-a	215	2.41e-19					31	2.9e-15	90	5.3e-16	158	1.1e-20
Homo sapiens	gi|15375314|ref|NP_203129.1|	Hs_LHX4	215	1.05e-18					30	4e-15	89	2.3e-16	158	6e-21
Homo sapiens	gi|11641283|ref|NP_071758.1|	Hs_LHX5							5	1.4e-16	64	1.4e-17	181	7.7e-20
Homo sapiens	gi|134284359|ref|NP_055183.2|	Hs_LHX6-1							99	8.5e-14	160	2.6e-15	249	7.7e-20
Homo sapiens	gi|50083287|ref|NP_001001933.1|	Hs_LHX8							75	1.1e-12	136	4.3e-14	226	7.9e-20
Homo sapiens	gi|62241033|ref|NP_001014434.1|	Hs_LHX9-2							62	1.3e-15	124	3.1e-17	259	5e-19
Homo sapiens	gi|28893581|ref|NP_796372.1|	Hs_LMX1A					366	2.99e-19	35	1.1e-14	94	1.2e-15	196	1.1e-17
Homo sapiens	gi|4505007|ref|NP_002307.1|	Hs_LMX1B					356	1.18e-19	33	7.7e-17	92	1e-15	197	1e-17
Mnemiopsis leidyi	MLRB056951 GENBANK:JF912809	Ml_RB056951							65	5e-11	127	3.1e-11	206	5.6e-15
Mnemiopsis leidyi	ML053012a, GENBANK:JF912806	Ml_053012a							11	2.4e-14	72	3.2e-11	161	4e-15
Mnemiopsis leidyi	ML068131a GENBANK:JF912808	Ml_068131a	324	4.45e-15					126	1e-13	185	5.9e-16	267	8.9e-21
Mnemiopsis leidyi	ML132520a GENBANK:JF912807	Ml_132520a							5	2.6e-14	64	1.6e-11	247	1.2e-19
Nematostella vectensis	jgi|Nemve1|109857|e_gw.97.29.1	Nv_109857							5	5.4e-15	64	7.4e-15	154	8.4e-20
Nematostella vectensis	jgi|Nemve1|15442|gw.302.21.1	Nv_15442							1	5.5e-09	61	9.4e-16	129	1.5e-17
Nematostella vectensis	jgi|Nemve1|161808|estExt_gwp.C_240293	Nv_161808			286	7.71e-24			17	1.8e-15	79	6.8e-14	182	3.5e-15
Nematostella vectensis	jgi|Nemve1|246590|estExt_fgenesh1_pg.C_2280026	Nv_246590							28	1.6e-15	89	4.3e-15	181	1e-18
Nematostella vectensis	jgi|Nemve1|95727|e_gw.40.28.1	Nv_95727									1	5.2e-16	128	4.3e-17
Nematostella vectensis	jgi|Nemve1|98128|e_gw.48.23.1	Nv_98128							9	2e-15	71	5.9e-17	182	4.7e-19
Trichoplax adhaerens	jgi|Triad1|14836|gw1.2.1291.1	Ta_14836							1	4e-15	65	2.7e-13	157	1.9e-17
Trichoplax adhaerens	jgi|Triad1|20649|e_gw1.2.77.1	Ta_20649							12	1.3e-15	71	5.8e-13	141	4.6e-19
Trichoplax adhaerens	jgi|Triad1|30033|e_gw1.12.56.1	Ta_30033							4	3.2e-14	63	2e-14	179	2.5e-19
Trichoplax adhaerens	jgi|Triad1|30944|e_gw1.15.172.1	Ta_30944							17	1.4e-16	79	3.4e-14	185	1.6e-14
LMO Class
(---LIM---LIM---)
Species	Gene ID	Tree Symbol	LIM Domain A		LIM Domain B
Drosophila melanogaster	FBpp0074369	Dm_Bx	92	1.3e-13	156	3.9e-13
Drosophila melanogaster	FBpp0079545	Dm_CG5708	78	1.1e-12	172	6.4e-09
Homo sapiens	gi|4505005|ref|NP_002306.1|	Hs_LMO1	24	2.2e-15	88	8.2e-15
Homo sapiens	gi|214832121|ref|NP_001135787.1|	Hs_LMO2-2	30	1.1e-12	94	1.5e-15
Homo sapiens	gi|21361802|ref|NP_061110.2|	Hs_LMO3	13	1.9e-15	77	4.6e-15
Homo sapiens	gi|5803072|ref|NP_006760.1|	Hs_LMO4	23	1.1e-14	87	1.5e-16
Nematostella vectensis	jgi|Nemve1|170252|estExt_gwp.C_1430054	Nv_170252	19	7e-15	83	5.1e-17
Nematostella vectensis	jgi|Nemve1|197606|fgenesh1_pg.scaffold_6000119	Nv_197606	20	8.6e-14	84	1e-13
Nematostella vectensis	jgi|Nemve1|53046|gw.131.80.1	Nv_53046	2	7e-14	66	2.8e-13
Trichoplax adhaerens	jgi|Triad1|16471|gw1.2.1438.1	Ta_16471	2	2.7e-13	66	2e-14
LIMK Class
(---LIM---LIM------PDZ---------Kinase---)
Species	Gene ID	Tree Symbol	LIM Domain A		LIM Domain B		PDZ Domain		Kinase Domain
Amphimedon queenslandica	Aqu1.213282|PACid:15711810	Aq_213282	2	1.7e-08	44	3.5e-09	189	0.17	Pkinase_tyr*	376, 489	3.50E-17, 7.20E-15	* Broken into 2 parts
Capsaspora owczarzaki	CAOG_05847T0	Co_05847T0	16	3.4e-14	75	5.5e-10	438	0.11	Pkinase	660	1.7e-54	TFIIA	194	0.36
Drosophila melanogaster	FBpp0073492	Dm_LIMK1	33	2.1e-11	95	1.3e-11	210	5.8e-07	Pkinase	381	8e-46
Homo sapiens	gi|4505001|ref|NP_002305.1|	Hs_LIMK1	25	1e-15	84	4.2e-14	166	3.3e-16	Pkinase_tyr	341	3e-55
Homo sapiens	gi|5031869|ref|NP_005560.1|	Hs_LIMK2-2a	12	3.8e-16	72	6.4e-09	153	3.2e-17	Pkinase_tyr	333	2.3e-50
Nematostella vectensis	jgi|Nemve1|241192|estExt_fgenesh1_pg.C_410066	Nv_241192	11	8.5e-12	70	2.2e-09	168	4.6e-05	Pkinase	377	3.2e-40
LMO7 Class
(--(CH)----(PDZ)-----------LIM)
Species	Gene ID	Tree Symbol	CH Domain		PDZ Domain		LIM Domain
Amphimedon queenslandica	Aqgi.297169953.gb.GL345388.1_fg_1, GENBANK: JN615188	Aq_216532	16	8.7e-09	294	1.1e-12	763	7.1e-05
Drosophila melanogaster	FBpp0078505	Dm_CG31534					820	1.1e-05
Homo sapiens	gi|163310743|ref|NP_001106188.1|	Hs_LIMCH1-b	29	2.9e-08			987	6.3e-07
Homo sapiens	gi|33598968|ref|NP_005349.3|	Hs_LMO7-1	81	1.6e-08	721	2e-07	1280	4.5e-07
Homo sapiens	gi|148298722|ref|NP_009081.2|	Hs_ZNF185-4					629	0.0043
Mnemiopsis leidyi	ML120740b, GENBANK: JN615196	Ml_120740b	32	1.1e-09	243	1.9e-08	521	2.6e-05
Nematostella vectensis	jgi|Nemve1|216756|fgenesh1_pg.scaffold_271000011	Nv_216756	33	0.001			2251	5.3e-07
MICAL Class
(--(Monoxygenase)---CH---LIM---DUF3585)
Species	Gene ID	Tree Symbol	MICAL Monox N-Terminal	Monoxygenase Domain			MICAL Monox C-Terminal	CH Domain		LIM Domain		DUF3585 Domain
Amphimedon queenslandica	Aqu1.218278|PACid:15716806	Aq_218278						460	5.2e-17	772	3.2e-08	1233	5e-28
Amphimedon queenslandica	Aqu1.224949|PACid:15723477	Aq_224949	X	Pyr_redox_2	103	0.0011	X	634	6.1e-14	880	1.6e-08	1149	5.4e-23
Drosophila melanogaster	FBpp0081686	Dm_Mical	X	FAD_binding_2	130	0.00019	X	566	1.4e-08	806	1.2e-06	2570	2.6e-31
Drosophila melanogaster	FBpp0075632	Dm_MICALlike						14	2.9e-19	150	1.1e-07	778	9.5e-50
Homo sapiens	gi|205360947|ref|NP_073602.3|	Hs_MICAL1-1	X	FAD_binding_3	85	3.7e-06	X	511	5.2e-15	697	1.8e-06	926	5e-36
Homo sapiens	gi|7662284|ref|NP_055447.1|	Hs_MICAL2	X	FAD_binding_3	87	1.1e-06	X	521	1.2e-20	1002	5.6e-08
Homo sapiens	gi|209862789|ref|NP_056056.2|	Hs_MICAL3-1	X	FAD_binding_3	87	2.3e-05	X	522	4.9e-18	764	9.4e-09	1848	6.3e-46
Homo sapiens	gi|31324577|ref|NP_203744.1|	Hs_MICALL1						5	1.1e-21	164	1e-06	678	8.2e-49
Homo sapiens	gi|33667117|ref|NP_891554.1|	Hs_MICALL2-1						5	3.5e-20	188	8.2e-07	736	9.9e-44
Mnemiopsis leidyi	ML223524b, GENBANK: JN615201	Ml_223524b	X	FAD_binding_3	87	2.3e-05	X	522	4.9e-18	764*	9.4e-09	1849	6.3e-46	*In Fig. S1-3, the sequence of this LIM domain is taken from an older gene model
Mnemiopsis leidyi	ML27321b, GENBANK: JN615203	Ml_27321b						9	3.7e-20	497	2e-07	726	1.2e-20
Mnemiopsis leidyi	ML08716b, GENBANK: JN615202	ML08716b	X	Pyr_redox_2	92	0.00045	X	556	1e-11	761*	5.7e-07	1239	5.2e-21	*In Fig. S1-3, the sequence of this LIM domain is taken from an older gene model
Nematostella vectensis	jgi|Nemve1|238942|estExt_fgenesh1_pg.C_100044	Nv_238942						32	8e-22	398	1.4e-05	974	5.4e-43
Nematostella vectensis	jgi|Nemve1|244476|estExt_fgenesh1_pg.C_1230020	Nv_244476	X	FAD_binding_2	93	4.4e-05	X	519	9.5e-19	759	1.4e-06	1384	3.4e-36	Not included in phylogenetic analyses.
Trichoplax adhaerens	jgi|Triad1|51838|fgeneshTA2_pg.C_scaffold_1000585	Ta_51838	X	FAD_binding_3	120	2.5e-06	X	549	5.9e-18	747	13.7	923	1e-11	Not included in phylogenetic analyses.
PXN Class
(---LD-/Paxillin-----------LIM---LIM---LIM---LIM---)			* No E-value available
Species	Gene ID	Tree Symbol	Paxillin LD Motif A		Paxillin LD Motif B		Paxillin (includes some LD motifs)		LIM Domain A		LIM Domain B		LIM Domain C		LIM Domain D
Amphimedon queenslandica	Aqu1.224218|PACid:15722746	Aq_224218	258	1.27e-21	4, 31, 137, 204	*,*,*,*			279	5.2e-16	338	7.7e-15	397	1.5e-10	456	2.4e-13
Capsaspora owczarzaki	CAOG_06505T0	Co_06505T0	156	*	1, 53, 81, 118, 155	1.25E-12, *, *, *, *			180	1.2e-17	239	1.2e-16	298	7.3e-15	357	1.9e-14
Drosophila melanogaster	FBpp0080753	Dm_Pax	302	2.45e-25	5, 102, 145, 226	*, 6.72E-10, *, *	136	0.17	323	7.6e-18	382	2.7e-16	441**	5.9e-16	500	5.9e-12	** An alternative sequence for LIM Domain C from FBpp0080755 (isoform D) is included in Fig. S1-S3. This sequence is labeled Dm_Pax.C-d.
Homo sapiens	gi|4758670|ref|NP_004802.1|	Hs_LPXN-2	131	4.01e-17	1	3.23e-11			152	1.6e-15	211	4e-16	270	7.8e-16	329	2.2e-13	Unclassified Motif B	54	6.31e-25
Homo sapiens	gi|170932518|ref|NP_079433.3|	Hs_PXN-3			130	8.25e-10	1	3.7e-56	191	3e-19	250	5.1e-17	309	1.3e-16	368	1.6e-14
Homo sapiens	gi|21361591|ref|NP_057011.2|	Hs_TGFB1I1-2	190	2.14e-21	138	6.06e-10	25	2.5e-06	211	1.3e-15	270	4.8e-16	329	2.2e-15	388	7.5e-14
Mnemiopsis leidyi	ML001118a, GENBANK: JN615200	ML001118a	205	7.95e-16	5, 121, 171	*, 1.06E-08, *			226	2.7e-16	285	9.5e-16	346	1.2e-14	405	1.1e-14
Monosiga brevicollis	jgi|Monbr1|19246|estExt_Genewise1.C_20560	Mb_19246							3	1.6e-07	49	1.4e-13	107	9.1e-15	166	2.2e-14
Nematostella vectensis	jgi|Nemve1|104924|e_gw.75.150.1	Nv_104924	5	4.68e-24	**				26	4e-19	85	4.9e-17	144	4.6e-16	203	2.6e-13	** 5 motifs found in jgi|Nemve1|185802|estExt_GenewiseH_1.C_750109 alternative model
Salpingoeca rosetta	PTSG_08126T0	Sr_08126T0			6	9.23e-11			233	4.3e-11	292	8.8e-12	350	1e-15	409	2.8e-16
Trichoplax adhaerens	jgi|Triad1|13161|gw1.9.354.1	Ta_13161	43	3.64e-20	6, 37	9.17E-10, *			64	1.2e-17	123	9.8e-16	182	7.5e-15	241	2e-11
PINCH Class
(--LIM---LIM---LIM---LIM---LIM---PM-)
Species	Gene ID	Tree Symbol	LIM Domain A		LIM Domain B		LIM Domain C		LIM Domain D		LIM Domain E		PINCH Motif (PM)
Amphimedon queenslandica	Aqu1.215055|PACid:15713583	Aq_215055	7	8.9e-15	68	1e-10	130	2.7e-06	189	1.6e-14	248	6.7e-09	307	8.97e-11
Capsaspora owczarzaki	CAOG_04083T0	Co_04083T0	6	1.8e-09	67	2.2e-12	129	5.5e-10	187	3.1e-16	246	0.0005
Drosophila melanogaster	FBpp0081334	Dm_stck	8	4e-15	69	6.8e-09	133	3.8e-07	201	9.2e-15	260	1.6e-09	318	*	No e-value given because discovered using alternative methods.
Homo sapiens	gi|13518026|ref|NP_004978.2|	Hs_LIMS1-b	10	1.4e-14	71	9e-13	135	5.6e-11	193	1.4e-14	252	1.8e-10	309	1.21e-15
Homo sapiens	gi|209862875|ref|NP_001129509.1|	Hs_LIMS2-1	10	1.3e-14	71	1.6e-11	135	7.9e-10	193	1.6e-14	252	1.4e-10	309	3.8e-15	Alternate isoform gi|40804748|ref|NP_060450.2| was also included in Fig. S1-3 as Hs_LIMS2-2
Homo sapiens	gi|239741720|ref|XP_002342298.1|	Hs_LIMS3	72	4.9e-15	133	5.8e-13	197	1.1e-05							*Two alternative models, gi|239741720|ref|XP_002342298.1|, and gi|15743548|ref|NP_277049.1|| are include in Fig. S1-3 as LIMS3-b and LIMS3-c, respectively.
Mnemiopsis leidyi	ML12076b, GENBANK:JN615198	Ml_12076b	194*	3.6e-09	264*	4.7e-09	326	1.1e-07	384	9.9e-13	443*	4.3e-06			*In Fig. S1-S3, LIM domains A, B, and E are represented by truncated sequences. LIM domain A is represented by two alternatively spliced sequences, ML12076b.A-a, and ML12076b.A-b. ML12076b also contains a CRP motif.
Mnemiopsis leidyi	ML128211a, GENBANK:JN615197	Ml_128211a	6	2.2e-14	67	1.1e-10	130	5.6e-09	188	9.1e-16	247	3.7e-05	306	1.49e-12
Nematostella vectensis	jgi|Nemve1|160257|estExt_gwp.C_120473	Nv_160257	21	2.7e-10	82	4.7e-10	146	0.0017	205	7.3e-14	264	1.1e-08	321	3.52e-11
Trichoplax adhaerens	jgi|Triad1|18460|e_gw1.1.500.1	Ta_18460	9	8.4e-13	70	3e-11	134	8.5e-10	193	1.2e-15	253	5.6e-10
TES Class
(TMA1-TMA2-----PET----LIM---LIM---LIM---(LIMx3)) (-LIM(half)---LIM---LIM---LIM---LIM-)
Species	Gene ID	Tree Symbol	Testin Motif A1 (TMA1)		Testin Motif A2 (TMA2)		PET Domain		LIM Domain A		LIM Domain B		LIM Domain C		LIM Domain D		LIM Domain E		LIM Domain F
Amphimedon queenslandica	Aqu1.217335|PACid:15715863	Aq_217335	29	2.06e-12	47	4.09e-22	93	2.4e-23	177	5.9e-11	243	3.8e-12	303	1.7e-06	362	3.3e-10	423	3e-09	483	3.9e-09
Amphimedon queenslandica	Aqu1.217773|PACid:15716301	Aq_217773	22	5.6e-18			117	6.7e-23	230	8.2e-09	278	5.4e-11	338	1.2e-08
Drosophila melanogaster	FBpp0086110	Dm_CG6522	33	2.34e-15	51	9.27e-25	109	1.5e-19	627	9.2e-10	693	1.7e-08	755	2.4e-06
Drosophila melanogaster	FBpp0088109	Dm_esn					135	1.2e-43	244	6.3e-11	309	1.4e-12	369	0.00089
Drosophila melanogaster	FBpp0291920	Dm_Lmpt					82	2.1e-32	192	1.1e-11	257	6e-13	317	1e-10	378	3.3e-10	439	1e-12	498	1.2e-09
Drosophila melanogaster	FBpp0088113	Dm_pk					179	1.1e-43	288	5.9e-12	353	2.5e-13	413	0.00018
Homo sapiens	gi|21361122|ref|NP_001440.2|	Hs_FHL1-2									4*	0.67	40	6.2e-11	101	7.7e-12	162	1.1e-11	221	6.2e-10	*This LIM domain was omitted from Fig. S1-S3.
Homo sapiens	gi|42403575|ref|NP_963849.1|	Hs_FHL2									4	0.0052	40	5.8e-10	101	7.2e-13	162	9.2e-12	221	2.4e-09
Homo sapiens	gi|54112385|ref|NP_004459.2|	Hs_FHL3									3	0.0015	40	4.3e-09	101	1.6e-12	162	5.5e-13	221	6.7e-11
Homo sapiens	gi|30410801|ref|NP_065228.3|	Hs_FHL5									4	0.00067	41	2.1e-10	102	4.7e-12	163	1.1e-08	222	1.3e-09
Homo sapiens	gi|7657309|ref|NP_055398.1|	Hs_LMCD1			35	5.77e-23	98	9e-43	262	2.3e-11	308	3.6e-11
Homo sapiens	gi|222136678|ref|NP_694571.2|	Hs_PRICKLE1	2	4.1e-15			15	2e-43	126	1e-09	191	1.6e-09	251	2.3e-05
Homo sapiens	gi|38524620|ref|NP_942559.1|	Hs_PRICKLE2					18	1.3e-43	130	1.8e-10	195	9.2e-11	255	3.3e-05
Homo sapiens	gi|7710129|ref|NP_006141.2|	Hs_PRICKLE3			34	4.36e-27	75	5.8e-43	186	2.1e-10	251	7.6e-08	311	1.3e-05
Homo sapiens	gi|118722347|ref|NP_037529.3|	Hs_PRICKLE4					69	3.3e-09	124	1.8e-09	189	3.5e-09
Homo sapiens	gi|23238188|ref|NP_690042.1|	Hs_TES-2			20	2.51e-26	83	3.3e-43	227	2.8e-12	292	3.3e-14	352	0.00013
Mnemiopsis leidyi	ML148516b, GENBANK: JN615189	Ml_148516b							234	2.1e-07	298*	3.4e-07	358	1.4e-07							*In Fig S1-3, the sequence of LIM Domain B is represented by an older gene model, Ml_148516a
Mnemiopsis leidyi	ML218921a, GENBANK: JN615190	Ml_218921a					93	2e-26	182	3e-12	243	3.3e-11	303	0.00041
Mnemiopsis leidyi	ML34571a, GENBANK: JN615191	Ml_34571a	18	7.36e-17			81	9.3e-21	179	0.00021	244	3.6e-10	315	0.0034
Monosiga brevicollis	jgi|Monbr1|22420|fgenesh2_pg.scaffold_2000627	Mb_22420			177	3.77e-22	218	1.7e-24	411	0.35	489	8.2e-10	550	3.7e-10
Nematostella vectensis	jgi|Nemve1|105385|e_gw.76.118.1	Nv_105385	2	2.15e-16	20	2.37e-23	76	1.6e-18	167	8.1e-11	232	1e-12	292	9e-09	355	6e-10	416	1.9e-09	475	2.1e-09
Nematostella vectensis	jgi|Nemve1|158093|estExt_gwp.C_20514	Nv_158093	20	2.34e-15	38	1.39e-24	95	2e-32	200	2.7e-12	265	3.1e-10	325	6.5e-06
Nematostella vectensis	jgi|Nemve1|177334|estExt_GenewiseH_1.C_20501	Nv_177334			41	9.79e-21	98	1.2e-24	193	1.5e-06	258	5e-11	318	1.7e-11	379	4.3e-10	440	2e-10	499	4.5e-10
Nematostella vectensis	jgi|Nemve1|51061|gw.76.136.1	Nv_51061					2	2.7e-13	82	5.3e-11	147	6.7e-13	207	1.2e-11
Nematostella vectensis	jgi|Nemve1|79617|e_gw.2.68.1	Nv_79617			20	7.32e-27	62	2.6e-40	172	4.2e-09	237	3.6e-10	297	1.2e-08
Nematostella vectensis	jgi|Nemve1|79983|e_gw.2.330.1	Nv_79983									5	6.5e-09	55	6.3e-07
Salpingoeca rosetta	PTSG_03013T0	Sr_03013T0							90	0.014	144	2.9e-11	205	2.9e-11
Salpingoeca rosetta	PTSG_04560T0	Sr_04560T0	29	1.94e-16	47	1.81e-23	377	9e-10	466	2.9e-10	530	2.7e-11
Salpingoeca rosetta	PTSG_07306T0	Sr_07306T0	97	4.84e-19	114	5.56e-25			229†	5.8e-05	303	7.2e-10	364†	3e-08
Salpingoeca rosetta	PTSG_10035T0	Sr_10035T0	91	1.14e-16	108	1.5e-21	301	1.1e-18	427	7.6e-05	469	4.5e-10	529†	4.1e-13
Trichoplax adhaerens	jgi|Triad1|26089|e_gw1.5.1076.1	Ta_26089			11	8.64e-24	61	2.2e-29	191	3e-10	235	4.6e-11	296	1.4e-08
ZYX Class
(---ZyM---------LIM---LIM---LIM)			*No e-value because discovered using alternative method
Species	Gene ID	Tree Symbol	Zyxin Motif (ZyM)		LIM Domain A		LIM Domain B		LIM Domain C
Amphimedon queenslandica	Aqu1.227874|PACid:15726402	Aq_227874			119†	1.8e-11	179	5.2e-10	239	6e-06
Drosophila melanogaster	FBpp0072068	Dm_CG30178			6	2.1e-11	65	1.2e-14	124	1.4e-12
Drosophila melanogaster	FBpp0292480	Dm_jub	479	*	506	9e-13	576	2e-11	636	2.3e-10
Drosophila melanogaster	FBpp0088278	Dm_Zyx102EF			326†	8.9e-13	386	7.4e-12	446	1e-06
Homo sapiens	gi|66932988|ref|NP_001019387.1|	Hs_FBLIM1-c			86†	4e-16	146	8.5e-11	206	9.4e-07
Homo sapiens	gi|14249622|ref|NP_116265.1|	Hs_JUB-1			338	2e-12	403	4.9e-09	463	3.3e-06
Homo sapiens	gi|7657307|ref|NP_055055.1|	Hs_LIMD1	446	*	472	8e-12	537	5.5e-10	597	4.1e-08
Homo sapiens	gi|5031887|ref|NP_005569.1|	Hs_LPP-a	118	4.77e-09	416	1.6e-12	476	7.5e-11	536	6.4e-09
Homo sapiens	gi|91208423|ref|NP_003293.2|	Hs_TRIP6	253	7.44e-10	279	5.9e-13	339	5.1e-11	399	9.8e-07
Homo sapiens	gi|122937269|ref|NP_001073905.1|	Hs_WTIP	199	*	225	1.4e-12	290	8.5e-12	350	1.9e-08
Homo sapiens	gi|4508047|ref|NP_003452.1|	Hs_ZYX	145	1.68e-08	384	2.3e-14	444	1.7e-12	504	4.5e-10
Mnemiopsis leidyi	ML11321a, GENBANK: JN615199	Ml_11321a			1077	2.2e-13	1137	5.5e-09	1197	6.7e-09	DSL	223	0.0063	DSL	267	0.00049	DSL	813	0.00069
Nematostella vectensis	jgi|Nemve1|110149|e_gw.98.120.1	Nv_110149	10	1.19e-10	36	3.5e-13	96	2e-08	156	1.8e-09
Nematostella vectensis	jgi|Nemve1|132927|e_gw.313.30.1	Nv_132927			2	1.1e-10	49	2.3e-11	109	5.5e-05
Rassf Group
(---LIM--------RA-)
Species	Gene ID	Tree Symbol	LIM Domain A		RA Domain
Amphimedon queenslandica	Aqu1.215865|PACid:15714393	Aq_215865	38	2.1e-13	337	4.8e-09
Drosophila melanogaster	FBpp0083799	Dm_Rassf	4	2.2e-11	674	1.8e-13
Trichoplax adhaerens	jgi|Triad1|55975|fgeneshTA2_pg.C_scaffold_4000866	Ta_55975	4	3.8e-09	209	4.3e-07
Unclassified
Species	Gene ID	Tree Symbol
Amphimedon queenslandica	Aqu1.211654|PACid:15710182	Aq_211654	LIM	290	7.8e-05	LIM	347	0.00028
Amphimedon queenslandica	Aqu1.225851|PACid:15724379	Aq_225851	LIM	17	3.5e-06	LIM	795	9.7e-11
Amphimedon queenslandica	Aqu1.229171|PACid:15727699	Aq_229171	LIM	171	5.8e-06	LIM	230	2.9e-06	RGS	409	1.5e-15											1928	6.7e-13
Capsaspora owczarzaki	CAOG_00254T0	Co_00254T0	C2	258	0.0014	RasGAP	547	6.2e-14	Guanylate_cyc	1227	3.4e-27	Guanylate_cyc	1466	9.9e-22	LIM	1806	6.6e-09	LIM	1869	7.9e-13	LIM
Capsaspora owczarzaki	CAOG_00633T0	Co_00633T0	LIM	34	3.5e-09	DEP	639	9.7e-18	DEP	820	8.3e-15	DEP	1061	2.5e-10	Rap_GAP	1391	4.5e-63					883	7.3e-06
Capsaspora owczarzaki	CAOG_00751T0	Co_00751T0	CH	8	8.6e-08	RhoGEF	153	5.6e-47	PH	370	4.7e-05	LIM	699	2.9e-13	LIM	759	8.6e-12	LIM	822	3.5e-10	LIM
Capsaspora owczarzaki	CAOG_00929T0	Co_00929T0	LIM	5	6.8e-09	LIM	63	0.00058	LIM	119	5.7e-08	LIM	188	1.8e-16	LIM	246	3e-05	LIM	291	5.2e-08		1267	9.8e-09
Capsaspora owczarzaki	CAOG_02521T0	Co_02521T0	PH	26	1e-07	RasGAP	331	4.8e-30	PH	718	1.3e-12	LIM	1090	9.9e-22	LIM	1150	1.3e-08	LIM	1208	7e-08	LIM
Capsaspora owczarzaki	CAOG_03021T0	Co_03021T0	PH	21	1.8e-09	LIM	773	1.4e-07	CH	905	4.6e-19											2.5e-42	C2	983	1.2e-05
Capsaspora owczarzaki	CAOG_03477T0	Co_03477T0	LIM	6	2.5e-12	LIM	64	4.9e-11	LIM	121	2.7e-07	SH2	241	efhand_like	574	2.2e-11	PI-PLC-X	675	2.7e-55	PI-PLC-Y	837	1598	3.6e-14	LIM	1659	7.8e-10	LIM	1719	3.2e-11
Capsaspora owczarzaki	CAOG_03826T0	Co_03826T0	C2	33	2.9e-06	C2	186	0.00086	RasGAP	446	4.7e-31	GIT1_C	841	7.9e-15	Guanylate_cyc	1046	4.4e-30	Guanylate_cyc	1308	6.2e-16	LIM
Capsaspora owczarzaki	CAOG_03950T0	Co_03950T0	LIM	219	5e-09	LIM	275	1.9e-07	RGS	455	9.4e-14	PX	598	0.027
Capsaspora owczarzaki	CAOG_04084T0	Co_04084T0	LIM	10	6.8e-06	LIM	94	1.2e-14
Capsaspora owczarzaki	CAOG_04110T0	Co_04110T0	Unclassified Motif A	88	5.18e-09	LIM	249	2.5e-12	LIM	309	3.7e-11	LIM	374	3.7e-14	LIM	433	2.3e-11
Capsaspora owczarzaki	CAOG_04145T0	Co_04145T0	LIM	4*	1.7e-12						*This domain falls within the CRP clade but without corroborating evidence it cannot be classified as a CRP gene.
Capsaspora owczarzaki	CAOG_04350T0	Co_04350T0	LIM	25	5.2e-10																	423	2.7e-05
Capsaspora owczarzaki	CAOG_04622T0	Co_04622T0	LIM	74	0.22	LIM	112	0.0011	LIM	145	3.2e-11	Unclassified Motif A	246	2.8e-08	LIM	265	1.9e-07	LIM	325	4e-07	LIM
Capsaspora owczarzaki	CAOG_05072T0	Co_05072T0	Unclassified Motif A	1	4.92e-10	LIM	27	5e-16	LIM	88	1.2e-13	LIM	147	1.8e-11
Capsaspora owczarzaki	CAOG_06515T0	Co_06515T0	Pkinase	36	5.4e-57	Bacillus_HBL	951	0.0012	LIM	1249	2.6e-13	LIM	1307	1.7e-11	LIM	1360	1.8e-10	LIM	1612	1.1e-08	LIM	1638	2.7e-09
Capsaspora owczarzaki	CAOG_06928T0	Co_06928T0	LIM	458	0.00014	LIM	492	1.3e-07	LIM	554	8.7e-11	LIM	612	1.1e-06	LIM	642	0.0017
Capsaspora owczarzaki	CAOG_07046T1	Co_07046T1	Rap_GAP	196	3.7e-32	LIM	488	1.6e-15	LIM	425	3.3e-13	LIM	547	3.9e-08	LIM	586	9.2e-10	LIM	632	1.4e-12	Fig, S1 and S3 include duplicate sequences Co_07046T0 CAOG_07046T0
Capsaspora owczarzaki	CAOG_07939T0	Co_07939T0	LIM	5	1.2e-10	LIM	64	7.8e-11	LIM	120	4.7e-12	LIM	185	4.9e-13	LIM	244	1.8e-10
Capsaspora owczarzaki	CAOG_07975T0	Co_07975T0	LIM	6	0.00039	SH2	156	0.0046	efhand_like	464	0.00081	PI-PLC-X	566	4.5e-57	PI-PLC-Y	736	0.00078
Capsaspora owczarzaki	CAOG_08158T0	Co_08158T0	LIM	7	2.6e-07
Capsaspora owczarzaki	CAOG_08582T0	Co_08582T0	Pkinase	17	7.9e-44	LIM	1087	1.7e-16	LIM	1148	1.4e-07	LIM	1205	2.4e-10	LIM	1265	5.1e-13
Drosophila melanogaster	FBpp0078505	Dm_CG31534	Unclassified Motif A	221	1.37e-09	LIM	820	1.2e-05
Drosophila melanogaster	FBpp0081019	Dm_CG31624	LIM	7	1.4e-13	LIM	66	1.1e-16	LIM	126	0.0014	A second isoform of this gene with duplicate LIM sequences is included in Fig. S1 -S3 as Dm_CG31988
Drosophila melanogaster	FBpp0111439	Dm_CG34325	LIM	8	3.4e-15	LIM	67	8.2e-15	LIM	127	2.3e-14
Drosophila melanogaster	FBpp0085567	Dm_Hil	LIM	11	1.8e-05
Homo sapiens	gi|328683461|ref|NP_001192217.1|	*Hs_LIMS3L	LIM	72	3.6e-10	*This sequence was not included in phylogenetic analyses.
Homo sapiens	gi|238908499|ref|NP_659001.2|	*Hs_SCEL	LIM	621	0.021	*This sequence was not included in phylogenetic analyses.
Mnemiopsis leidyi	ML064935a, GENBANK:JN615205	Ml_064935a	LIM	9	4.6e-14	LIM	68	0.002	CAP	160	3.5e-12
Mnemiopsis leidyi	ML06737a, GENBANK: JN615206	Ml_06737a	LIM	8	1.7e-11	LIM	68	3.1e-07
Mnemiopsis leidyi	ML07501b , GENBANK: JN615210	Ml_07501b	LIM	10	1.2e-09	LIM	63*	1.4e-05	LIM	129	2.5e-09	LIM	200	1.7e-10	LIM	260	0.00023	This LIM domain was not included in phylogenetic analyses.
Mnemiopsis leidyi	ML15452a, GENBANK: JN615207	Ml_15452a	LIM	84	9.2e-11	LIM	151	3.5e-10	LIM	209	1.9e-07
Mnemiopsis leidyi	ML200239a, GENBANK: JN615211	Ml_200239a	LIM	5	1.7e-11
Mnemiopsis leidyi	ML20602b, GENBANK: JN615208	Ml_20602b	LIM	7	1.7e-09	LIM	66	0.00042
Mnemiopsis leidyi	ML46393a, GENBANK: JN615209	Ml_46393a	SH3_2	23	0.00033	Unclassified Motif A	324	3.23e-11	LIM	675	3.9e-06	CAP	773	0.00022
Monosiga brevicollis	jgi|Monbr1|11965|fgenesh1_pg.scaffold_33000088	Mb_11965	eIF3_subunit	376	2.1e-09	LIM	656	7.7e-12
Monosiga brevicollis	jgi|Monbr1|13898|e_gw1.2.920.1	Mb_13898	LIM	4	2.4e-13
Monosiga brevicollis	jgi|Monbr1|14597|e_gw1.3.699.1	Mb_14597	LIM	2	5.8e-16
Monosiga brevicollis	jgi|Monbr1|24292|fgenesh2_pg.scaffold_6000201	Mb_24292	PLAT	85	0.0075	SpoIIE	270	2.7e-06	LIM	502	2.4e-13
Monosiga brevicollis	jgi|Monbr1|26008|fgenesh2_pg.scaffold_12000157	Mb_26008	LIM	23	3e-08	LIM	94	0.00089	SAM_1	243	7.8e-11
Monosiga brevicollis	jgi|Monbr1|30838|estExt_fgenesh2_pg.C_20313	Mb_30838	LIM	26	5.9e-09	LIM	87	0.00011	RhoGAP	237	2.5e-15
Monosiga brevicollis	jgi|Monbr1|31118|estExt_fgenesh2_pg.C_30066	Mb_31118	Amidohydro_2	85	3.6e-20	Ion_trans	442	3.2e-07	DSPc	582	6.6e-09	PTEN_C2	785	1.6e-06	LIM	851	2.7e-12	CRP Motif A	909	1.49e-13
Monosiga brevicollis	jgi|Monbr1|31161|estExt_fgenesh2_pg.C_30148	Mb_31161	LIM	171	1.5e-07	LIM	226	2.8e-07	RGS	492	0.00036	PX	715	9.8e-09	Pinin_SDK_memA	933	3.3e-32
Monosiga brevicollis	jgi|Monbr1|38749|estExt_fgenesh1_pg.C_310009	Mb_38749	PDZ	7	6e-12	LIM	332	4.1e-08	LIM	391	1.3e-09
Nematostella vectensis	jgi|Nemve1|127058|e_gw.234.37.1	Nv_127058	LIM	2	1.4e-07	LIM	48	1.5e-12	LIM	109	2.1e-06
Nematostella vectensis	jgi|Nemve1|148735|e_gw.2584.1.1	Nv_148735	LIM	5	8e-12
Nematostella vectensis	jgi|Nemve1|80146|e_gw.2.391.1	Nv_80146	LIM	1	8.6e-08
Nematostella vectensis	jgi|Nemve1|9977|gw.15809.2.1	Nv_9977	LIM	3	1.6e-09
Salpingoeca rosetta	PTSG_00195T0	Sr_00195T0	SR-25	5	0.0002	JmjC	231	0.00027	LIM	290	4.9e-07	CRP Motif A	325	7.94e-13
Salpingoeca rosetta	PTSG_02877T0	Sr_02877T0	LIM	23	2.3e-14
Salpingoeca rosetta	PTSG_05818T0	Sr_05818T0	PDZ	8	1.4e-08	LIM	232	1.9e-10	LIM	291	6.8e-09
Salpingoeca rosetta	PTSG_05830T0	Sr_05830T0	LIM	717	1.1e-12
Salpingoeca rosetta	PTSG_07101T0	Sr_07101T0	CRP Motif A	33	*	LIM	706	2.6e-11	VPS28	793	2.5e-33
Salpingoeca rosetta	PTSG_09982T0	Sr_09982T0	LIM	366	2.3e-12
Trichoplax adhaerens	jgi|Triad1|20314|e_gw1.1.934.1	Ta_20314	LIM	93	0.015	This is a zinc finger protein, not a LIM protein.
Trichoplax adhaerens	jgi|Triad1|53655|fgeneshTA2_pg.C_scaffold_2000812	Ta_53655	LIM	670	3.5e-05
Additional ENIGMA Class Sequences in FIG. S6,S7
(PDZ----ZM--AM---LIM---LIM---LIM) (PDZ---ZM--AM---LIM------LIM---LIM---LIM) (PDZ---ZM---AM---LIM)			*Not analyzed
Species	Gene ID	Tree Symbol	Zasp Motif (ZM)		ALP Motif (AM)		PDZ Domain		LIM Domain A (Alp-like)		LIM Domain B (Enigma-like A)		LIM Domain C (Enigma-like B)		LIM Domain D (Enigma-like C)
Branchiostoma floridae	jgi|Brafl1|123730|estExt_fgenesh2_pg.C_1270031	Bf_123730	386, 493	1.92E-05, 1.14E-07**	571	0.12**	98	1.6e-10	695	6.1e-12	821	1.8e-11	880	3e-09	939	1.4e-10	** E-values given from hmmsearch on SMART ZM SM00735 and manually currated AM HMM. See methods.
Branchiostoma floridae	jgi|Brafl1|124330|estExt_fgenesh2_pg.C_1450059	Bf_124330	*		*		73	0.00014	273	4.4e-09
Caenorhabditis elegans	CE35945	Ce_alp-1	*		*		6	0.05	220	3.3e-07	472	5.1e-07	533	9.5e-14	592	1e-11
Capitella teleta	jgi|Capca1|163591|estExt_Genewise1.C_350071	Ct_163591	134**	2.4e-06			13	1.4e-10			239	8.1e-09	300	1.8e-10	359	8.3e-15	**Detected with SMART HMM SM00735	A fourth LIM domain, Ct_163591.D, has been found in gi|161229555|gb|EY561568.1|EY56156 it is likely an alternative transcript.
Ciona intestinalis	jgi|Cioin2|242372|estExt_genewise1.C_chr_07q1341	Ci_242372	*		*		10	1.6e-12			160	2.7e-09	221	1.2e-12	280	3.6e-10
Danio rerio	gi|63030039|gb|AAY27883.1|	Dr_ldb3	*		*		11	2.2e-13			473	2.4e-11	532	2e-14	591	1e-12
Danio rerio	gi|62955713|ref|NP_001017870.1|	Dr_pdlim1	*		*		7	2.4e-17	253	2.6e-09
Danio rerio	gi|112421209|ref|NP_001036231.1|	Dr_pdlim2	*		*		9	1.1e-12	292	1.1e-07
Danio rerio	gi|66773346|ref|NP_001019547.1|	Dr_pdlim3a	*		*		8	1.8e-14	244	5.2e-12
Danio rerio	gi|111955351|ref|NP_001036183.1|	Dr_pdlim3b	*		*		9	1.4e-14	245	1.5e-13
Danio rerio	gi|111607494|ref|NP_001036161.1|	Dr_pdlim4	*		*		8	6.9e-16	274	6.1e-14
Danio rerio	gi|50540376|ref|NP_001002654.1|	Dr_pdlim5	*		*		10	2.1e-12			375	2.1e-12	434	4.4e-13	493	6e-13
Danio rerio	gi|41053541|ref|NP_957134.1|	Dr_pdlim7	*		*		10	4.6e-11			244	8.6e-15	303	1.7e-13	362	2.5e-13
Danio rerio	gi|41055654|ref|NP_956490.1|	Dr_zgc:56116-2	*		*		11	4.6e-15			452	1e-10	511	2e-13	570	5.5e-13
Gallus gallus	gi|118092687|ref|XP_426503.2|	Gg_LOC428948-4	*		*		10	4.1e-19	249	8.5e-11
Gallus gallus	gi|48976033|ref|NP_001001764.1|	Gg_PDLIM3	*		*		9	2.2e-16	245	2.5e-13
Gallus gallus	gi|45382299|ref|NP_990170.1|	Gg_PDLIM4	*		*		9	4.8e-17	255	2.1e-14
Gallus gallus	gi|71896681|ref|NP_001026320.1|	Gg_PDLIM5	*		*		10	2.3e-12			419	3.9e-12	478	2.1e-13	537	1.3e-13
Gallus gallus	gi|52694652|ref|NP_001005345.1|	Gg_PDLIM7	*		*		7	6e-12			241	5.4e-13	300	1.4e-15	359	2.6e-13
Lottia gigantea	jgi|Lotgi1|183623|estExt_Genewise1.C_sca_60305/254-304	Lg_183623	*		*		14	2.1e-16	254	3.3e-13	97**	5.1e-10	158*	4.4e-13	217	4.4e-08	**Full sequences for these LIMs were retrieved from ESTs gi|163517112|gb|FC764023.1|FC764023 and gi|163520070|gb|FC765030.1|FC765030, as well as an FGENESH prediction. It is unclear whether this is one or two genes and is actually translated as a full length Tungus.
Saccoglossus kowalevskii	gi|187047144|gb|FF435875.1|FF435875	Sk_187047144	*		*						37	9.9e-15	96	2.3e-14	159	1.5e-13
Additional LIMK Class Sequences in FIG. S6,S7
(---LIM---LIM------PDZ---------Kinase---)
Species	Gene ID	Tree Symbol	LIM Domain A		LIM Domain B		PDZ Domain		Kinase Domain
Branchiostoma floridae	jgi|Brafl1|154430|gw.389.15.1	Bf_154430	1	8.5e-09	74	2e-11	173	3.4e-08	Pkinase_Tyr	318	2.1e-50
Capitella teleta	jgi|Capca1|165760|estExt_Genewise1.C_1080004	Ct_165760	33	8e-10	95	5.5e-09	220	5.5e-06	Pkinase_Tyr	331	6.2e-51
Danio rerio	gi|111548682|ref|NP_001036156.1|	Dr_limk1	27	2.1e-12	86	1.7e-12	165	6.6e-16	Pkinase_Tyr	345	6.2e-53
Danio rerio	gi|50540370|ref|NP_001002651.1|	Dr_limk2	12	1.4e-12	71	2.7e-10	153	4.1e-12	Pkinase_Tyr	340	4.8e-52
Gallus gallus	gi|45383844|ref|NP_989462.1|	Gg_LIMK1	26	8.7e-17	85	4.1e-14	173	2.2e-13	Pkinase_Tyr	348	1.1e-54
Gallus gallus	gi|45384122|ref|NP_990446.1|	Gg_LIMK2	12	3.2e-17	72	3.3e-09	153	3.6e-15	Pkinase_Tyr	333	2.5e-50
Lottia gigantea	jgi|Lotgi1|103637|e_gw1.2.10.1	Lg_103637	2	8.4e-13	61	3.7e-12	184	1.5e-06	Pkinase_Tyr	316	5.3e-43
Strongylocentrotus purpuratus	Sp_009240.B SPU_009240	Sp_009240	14	4.5e-15	73	1.7e-13	200	0.053
Additional LMO7 Class Sequences in FIG. S6,S7
(--(CH)----(PDZ)-----------LIM)
Species	Gene ID	Tree Symbol	CH Domain		PDZ Domain		LIM Domain
Branchiostoma floridae	jgi|Brafl1|117217|estExt_fgenesh2_pg.C_20344	Bf_117217	33	3e-08	729	4.1e-16	1584	7.2e-07
Caenorhabditis elegans	F28F5.3b	Ce_lin-8			382*	3.6e-08	800	3.1e-09	*This is actually Pfam HMM PDZ_2 (PF13180)
Danio rerio	gi|190194307|ref|NP_001121703.1	Dr_lm07a	19	9.3e-10	1187	5.5e-07	1757	2.2e-08
Danio rerio	gi|292609826|ref|XP_002660545.1	Dr_lmo7b	18	3.3e-08	837	5.4e-05	1314	2.8e-06
Gallus gallus	gi|118084759|ref|XP_417010.2|	Gg_LMO7			1011	4.4e-07	1581	3.8e-06
Saccoglossus kowalevskii	gi|291224837|ref|XP_002732412.1|	Sk_Lmo7b	34	2.9e-07	712	4.8e-12	1738	4.6e-07
