# Supplementary material for: The Diversification of the LIM Superclass at the Base of the Metazoa Increased Subcellular Complexity and Promoted Multicellular Specialization
Source: PLoS One. 2012 Mar 15;7(3):e33261. doi: 10.1371/journal.pone.0033261 (PMC3305314; doi:10.1371/journal.pone.0033261)
Supplement: Table S3 — LIM domain homology groups. We created 38 LIM domain homology groups based on concordant clades from a strict consensus of our human LIM domain tree (Fig. S3) and a pruned version of our nine-species LIM domain tree (Fig. S5). We assigned non-human LIM domains to these homology groups based on a nearest-neighbor analysis. Letters following the protein name represent the position of the LIM domain within the particular protein (e.g., Hs_ABLIM2.B refers to the second LIM domain in the Hs_ABLIM protein). (XLS) [file pone.0033261.s012.xls]

## Sheet: Sheet1
HOMOLOGY GROUP 1
PXN Class
Hs_TGFB1I1-2.A
HOMOLOGY GROUP 2
Primarily PXN Class
Aq_224218.D
Co_06505T0.D
Dm_Pax.D
Hs_LPXN-2.D
Hs_PXN-3.D
Hs_TGFB1I1-2.D
Mb_19246.D
Ml_001118a.D
Nv_104924.D
Sr_08126T0.D
Ta_13161.D
HOMOLOGY GROUP 3
Primarily PINCH Class
Aq_215055.B
Co_04083T0.B
Dm_stck.B
Hs_LIMS1-b.B
Hs_LIMS2-1.B
Hs_LIMS3.B
Hs_LIMS3.B-b
Ml_12076b.B
Ml_128211a.B
Nv_160257.B
Ta_18460.B
HOMOLOGY GROUP 4
Primarily PXN Class
Co_06505T0.A
Co_07046T0.B
Co_07046T1.B
Dm_Pax.A
Hs_LPXN-2.A
Hs_PXN-3.A
Ml_001118a.A
Nv_104924.A
HOMOLOGY GROUP 5
Primarily PINCH Class
Aq_215055.D
Co_00254T0.A
Co_03826T0.A
Co_04083T0.D
Co_04110T0.A
Co_07046T0.A
Co_07046T1.A
Co_08582T0.A
Dm_stck.D
Hs_LIMS1-b.D
Hs_LIMS2-1.D
Ml_12076b.D
Ml_128211a.D
Nv_160257.D
Ta_18460.D
HOMOLOGY GROUP 6
Primarily PXN Class
Aq_224218.B
Co_06505T0.B
Dm_Pax.B
Hs_LPXN-2.B
Hs_PXN-3.B
Hs_TGFB1I1-2.B
Nv_104924.B
HOMOLOGY GROUP 7
Primarily ENIGMA Class
Dm_Tungus.C
Hs_LDB3-2.B
Hs_PDLIM5-b.B
Hs_PDLIM7-2.B
HOMOLOGY GROUP 8
Primarily PINCH Class
Aq_215055.A
Co_04083T0.A
Co_08582T0.D
Dm_CG31624.B
Dm_CG31988.B
Dm_CG34325.B
Dm_stck.A
Hs_LIMS1-b.A
Hs_LIMS2-1.A
Hs_LIMS3.A
Hs_LIMS3.A-c
Ml_001118a.B
Ml_12076b.A-a
Ml_12076b.A-b
Ml_128211a.A
Nv_160257.A
Sr_10035T0.C
Ta_18460.A
HOMOLOGY GROUP 9
PXN Class
Hs_TGFB1I1-2.C
HOMOLOGY GROUP 10
PXN Class
Hs_LPXN-2.C
Hs_PXN-3.C
HOMOLOGY GROUP 11
ENIGMA Class
Hs_LDB3-2.A
HOMOLOGY GROUP 12
ENIGMA Class
Hs_PDLIM5-b.A
HOMOLOGY GROUP 13
ENIGMA Class
Hs_PDLIM7-2.A
HOMOLOGY GROUP 14
Primarily PINCH Class
Aq_215055.E
Co_04083T0.E
Co_08582T0.B
Dm_stck.E
Hs_LIMS1-b.E
Hs_LIMS2-1.E
Hs_LIMS2-2.E
Ml_12076b.E
Ml_128211a.E
Nv_160257.E
Ta_18460.E
HOMOLOGY GROUP 15+A205
Primarily ZYX Class
Aq_227874.B
Dm_Zyx102EF.B
Dm_jub.B
Hs_FBLIM1-c.B
Hs_JUB-1.B
Hs_LIMD1.B
Hs_LPP-a.B
Hs_TRIP6.B
Hs_WTIP.B
Hs_ZYX.B
Ml_11321a.B
Ml_223524b.A
Nv_110149.B
Nv_132927.B
HOMOLOGY GROUP 16
Primarily PINCH Class
Aq_215055.C
Aq_225851.B
Co_00929T0.A
Co_03477T0.A
Co_04083T0.C
Co_07939T0.A
Dm_stck.C
Hs_LIMS1-b.C
Hs_LIMS2-1.C
Hs_LIMS3.C
Hs_LIMS3.C-b
Ml_12076b.C
Ml_128211a.C
Nv_160257.C
Ta_18460.C
HOMOLOGY GROUP 17
Primarily TES Class
Dm_Lmpt.E
Hs_FHL1-2.D
Hs_FHL2.D
Hs_FHL3.D
Hs_FHL5.D
Nv_105385.E
Nv_127058.A
Nv_127058.B
Nv_127058.C
Nv_177334.E
Nv_177334.F
HOMOLOGY GROUP 18+A257
Primarily TES Class
Aq_217335.B
Aq_217773.B
Co_03826T0.B
Dm_CG6522.B
Dm_Lmpt.B
Dm_esn.B
Dm_pk.B
Hs_FHL2.A
Hs_FHL3.A
Hs_FHL5.A
Hs_LMCD1.B
Hs_PRICKLE1.B
Hs_PRICKLE2.B
Hs_PRICKLE3.B
Hs_PRICKLE4.B
Hs_TES-2.B
Mb_22420.B
Ml_148516b.B
Ml_218921a.B
Ml_34571a.B
Nv_105385.B
Nv_158093.B
Nv_177334.B
Nv_51061.B
Nv_79617.B
Nv_79983.A
Sr_03013T0.B
Sr_04560T0.B
Sr_07306T0.B
Sr_10035T0.B
Ta_13161.B
Ta_26089.B
HOMOLOGY GROUP 19
ABLIM and ZYX Classes
Aq_216587.C
Hs_FBLIM1-c.A
HOMOLOGY GROUP 20
Primarily ENIGMA Class
Aq_217763.C
Co_02521T0.D
Co_06515T0.D
Dm_Tungus.D
Hs_LDB3-2.C
Hs_PDLIM5-b.C
Hs_PDLIM7-2.C
Ml_108023a.C
Nv_239144.C
Ta_58345.C
HOMOLOGY GROUP 21
Primarily TES Class
Aq_217335.C
Aq_217335.D
Aq_217335.F
Aq_217773.C
Aq_225851.A
Co_03950T0.A
Co_04084T0.A
Co_04622T0.C
Co_06515T0.E
Dm_CG6522.C
Dm_Lmpt.C
Dm_Lmpt.D
Dm_Lmpt.F
Dm_esn.C
Dm_pk.C
Hs_FHL1-2.B
Hs_FHL1-2.C
Hs_FHL1-2.E
Hs_FHL2.B
Hs_FHL2.C
Hs_FHL2.E
Hs_FHL3.B
Hs_FHL3.C
Hs_FHL3.E
Hs_FHL5.B
Hs_FHL5.C
Hs_FHL5.E
Hs_PRICKLE1.C
Hs_PRICKLE2.C
Hs_PRICKLE3.C
Hs_TES-2.C
Mb_22420.C
Mb_31161.A
Mb_38749.A
Ml_148516b.C
Ml_218921a.C
Ml_34571a.C
Nv_105385.C
Nv_105385.D
Nv_105385.F
Nv_158093.C
Nv_177334.C
Nv_177334.D
Nv_51061.C
Nv_79617.C
Nv_79983.B
Nv_80146.A
Sr_03013T0.C
Sr_05818T0.A
Ta_26089.C
HOMOLOGY GROUP 22
ZYX Class
Hs_LPP-a.A
Hs_TRIP6.A
HOMOLOGY GROUP 23
ZYX Class
Dm_jub.A
Hs_JUB-1.A
Hs_LIMD1.A
Hs_WTIP.A
Nv_110149.A
Nv_132927.A
HOMOLOGY GROUP 24
Primarily ABLIM Class
Dm_unc-115.C
Hs_ABLIM1-b.C
Hs_ABLIM2.C
Hs_ABLIM3.C
Nv_164443.C
Ta_28417.C
Ta_58696.B
HOMOLOGY GROUP 25
ABLIM Class
Aq_216587.A
Dm_unc-115.A
Hs_ABLIM1-b.A
Hs_ABLIM2.A
Hs_ABLIM3.A
Ml_04674a.A
Ml_093519b.A
Nv_164443.A
Ta_28417.A
HOMOLOGY GROUP 26
Primarily LHX, LIMK, and LMO Classes
Aq_213282.A
Aq_218857.A
Aq_230128.A
Aq_LHX3.A
Co_07975T0.A
Dm_Awh.A
Dm_Bx.A
Dm_CG32105.A
Dm_CG4328.A
Dm_CG5708.A
Dm_LIMK1.A
Dm_Lim1.A
Dm_Lim3.A
Dm_ap.A
Dm_tup.A
Hs_ISL1.A
Hs_ISL2.A
Hs_LHX1.A
Hs_LHX2.A
Hs_LHX3-a.A
Hs_LHX4.A
Hs_LHX5.A
Hs_LHX6-1.A
Hs_LHX8.A
Hs_LHX9-2.A
Hs_LIMK1.A
Hs_LIMK2-2a.A
Hs_LMO1.A
Hs_LMO2-2.A
Hs_LMO3.A
Hs_LMO4.A
Hs_LMX1A.A
Hs_LMX1B.A
Ml_053012a.A
Ml_068131a.A
Ml_132520a.A
Ml_RB056951.A
Nv_109857.A
Nv_15442.A
Nv_161808.A
Nv_170252.A
Nv_197606.A
Nv_241192.A
Nv_246590.A
Nv_53046.A
Nv_95727.A
Nv_98128.A
Ta_14836.A
Ta_16471.A
Ta_20649.A
Ta_30033.A
Ta_30944.A
HOMOLOGY GROUP 27
Primarily CRP, EPLIN, LASP and MICAL Classes
Aq_213741.A
Aq_215865.A
Aq_218278.A
Aq_222999.A
Aq_222999.B
Aq_223000.A
Aq_223455.A
Aq_224095.A
Aq_224096.A
Aq_224097.A
Aq_224949.A
Co_00633T0.A
Co_00929T0.C
Co_02875T0.A
Co_02875T0.B
Co_04084T0.B
Co_04145T0.A
Co_04622T0.A
Co_04622T0.F
Co_05568T0.A
Co_07267T0.A
Co_07516T0.A
Co_08158T0.A
Dm_CG33521.A
Dm_Hil.A
Dm_Lasp.A
Dm_MICALlike.A
Dm_Mical.A
Dm_Mlp60A.A
Dm_Mlp60A.B
Dm_Mlp60A.C
Dm_Mlp60A.D
Dm_Mlp60A.E
Dm_Mlp84B.A
Dm_Mlp84B.B
Dm_Mlp84B.C
Dm_Mlp84B.D
Dm_Mlp84B.E
Dm_Rassf.A
Hs_CRIP1.A
Hs_CRIP2.A
Hs_CRIP2.B
Hs_CRIP3.A
Hs_CRIP3.B
Hs_CSRP1-1.A
Hs_CSRP1-1.B
Hs_CSRP2.A
Hs_CSRP2.B
Hs_CSRP3.2.A
Hs_CSRP3.2.B
Hs_LASP1.A
Hs_LIMA1-c.A
Hs_LIMD2.A
Hs_MICAL1-1.A
Hs_MICAL2.A
Hs_MICAL3-1.A
Hs_MICALL1.A
Hs_MICALL2-1.A
Hs_NEBL-2.A
Hs_NRAP-C.A
Hs_XIRP2-2.A
Mb_11965.A
Mb_13898.A
Mb_14597.A
Mb_16167.A
Mb_24292.A
Mb_26008.B
Mb_26577.A
Mb_31118.A
Mb_3283.A
Mb_34066.A
Ml_-27321b.A
Ml_02959a.A
Ml_02959a.B
Ml_038835b.A
Ml_08716b.A
Ml_200239a.A
Nv_108380.A
Nv_123146.A
Nv_132315.A
Nv_148735.A
Nv_178184.A
Nv_178189.A
Nv_214299.A
Nv_214299.A-2
Nv_214299.B
Nv_238942.A
Nv_247501.A
Nv_52979.A
Nv_52979.B
Nv_68197.A
Nv_78916.A
Nv_79564.A
Nv_81835.A
Nv_9977.A
Sr_00195T0.A
Sr_02877T0.A
Sr_05830T0.A
Sr_06072T0.A
Sr_07101T0.A
Sr_09345T0.A
Sr_09982T0.A
Ta_53655.A
Ta_9099.A
HOMOLOGY GROUP 28
ZYX Class and Unclassified
Hs_ZYX.A
Mb_26008.A
HOMOLOGY GROUP 29
ABLIM Class and Unclassified
Aq_211654.B
Aq_216587.B
Aq_216587.D
Aq_229171.A
Co_00751T0.D
Co_00929T0.B
Co_00929T0.E
Co_00929T0.F
Co_02521T0.B
Co_03477T0.B
Co_04350T0.A
Co_04622T0.D
Co_06928T0.B
Co_06928T0.D
Co_06928T0.E
Co_07939T0.B
Co_07939T0.E
Dm_unc-115.B
Dm_unc-115.D
Hs_ABLIM1-b.B
Hs_ABLIM1-b.D
Hs_ABLIM2.B
Hs_ABLIM2.D
Hs_ABLIM3.B
Hs_ABLIM3.D
Mb_19246.B
Mb_30838.B
Mb_31161.B
Ml_04674a.B
Ml_04674a.D
Ml_064935a.B
Ml_06737a.B
Ml_07501b.E
Ml_093519b.B
Ml_093519b.D
Ml_15452a.A
Ml_15452a.C
Ml_20602b.B
Ml_46393a.A
Nv_164443.B
Nv_164443.D
Ta_28417.B
Ta_28417.D
Ta_55975.A
Ta_58696.C
HOMOLOGY GROUP 30
LIMK Class
Aq_213282.B
Co_05847T0.B
Dm_LIMK1.B
Hs_LIMK1.B
Hs_LIMK2-2a.B
Nv_241192.B
HOMOLOGY GROUP 31
Primarily LMO7 Class
Aq_216532.A
Dm_CG31534.A
Hs_LIMCH1-b.A
Hs_LMO7-1.A
Hs_ZNF185-4.A
Nv_216756.A
HOMOLOGY GROUP 32
Primarily ZYX Class
Aq_227874.C
Co_04110T0.B
Co_05072T0.A
Co_05072T0.C
Co_05847T0.A
Co_06515T0.B
Dm_CG30178.B
Dm_Zyx102EF.C
Dm_jub.C
Hs_FBLIM1-c.C
Hs_JUB-1.C
Hs_LIMD1.C
Hs_LPP-a.C
Hs_TRIP6.C
Hs_WTIP.C
Hs_ZYX.C
Mb_30838.A
Mb_38749.B
Ml_11321a.C
Nv_110149.C
Nv_132927.C
Sr_05818T0.B
HOMOLOGY GROUP 33
Primarily ENIGMA Class
Co_08582T0.C
Dm_Tungus.A
Dm_Tungus.A-e
Hs_PDLIM1.A
Hs_PDLIM2-2.A
Hs_PDLIM3-b.A
Hs_PDLIM4-1.A
HOMOLOGY GROUP 34
TES Class
Aq_217335.A
Aq_217773.A
Co_04622T0.B
Dm_CG6522.A
Dm_Lmpt.A
Dm_esn.A
Dm_pk.A
Hs_LMCD1.A
Hs_PRICKLE1.A
Hs_PRICKLE2.A
Hs_PRICKLE3.A
Hs_PRICKLE4.A
Hs_TES-2.A
Mb_22420.A
Ml_148516a.A
Ml_218921a.A
Ml_34571a.A
Nv_105385.A
Nv_158093.A
Nv_177334.A
Nv_51061.A
Nv_79617.A
Sr_03013T0.A
Sr_04560T0.A
Sr_10035T0.A
Ta_26089.A
HOMOLOGY GROUP 35
LHX Class
Aq_230128.B
Dm_Awh.B
Dm_ap.B
Dm_tup.B
Hs_ISL1.B
Hs_ISL2.B
Hs_LHX2.B
Hs_LHX6-1.B
Hs_LHX8.B
Hs_LHX9-2.B
Ml_053012a.B
Nv_161808.B
Nv_246590.B
Ta_14836.B
Ta_30944.B
HOMOLOGY GROUP 36
LMO Class
Hs_LMO4.B
Nv_170252.B
HOMOLOGY GROUP 37
LMO Class
Dm_Bx.B
Hs_LMO1.B
Hs_LMO2-2.B
Hs_LMO3.B
Nv_197606.B
Nv_53046.B
HOMOLOGY GROUP 38
LHX Class
Aq_218857.B
Aq_LHX3.B
Dm_CG32105.B
Dm_CG4328.B
Dm_CG5708.B
Dm_Lim1.B
Dm_Lim3.B
Hs_LHX1.B
Hs_LHX3-a.B
Hs_LHX4.B
Hs_LHX5.B
Hs_LMX1A.B
Hs_LMX1B.B
Ml_068131a.B
Ml_132520a.B
Ml_RB056951.B
Nv_109857.B
Nv_15442.B
Ta_20649.B
Ta_30033.B
UNCLASSIFIED
Aq_211654.A
Aq_217335.E
Aq_217763.A
Aq_217763.B
Aq_224218.A
Aq_224218.C
Aq_227874.A
Aq_229171.B
Co_00254T0.B
Co_00254T0.C
Co_00751T0.A
Co_00751T0.B
Co_00751T0.C
Co_00929T0.D
Co_02521T0.A
Co_02521T0.C
Co_03021T0.A
Co_03477T0.C
Co_03826T0.C
Co_03950T0.B
Co_04110T0.C
Co_04110T0.D
Co_04622T0.E
Co_05072T0.B
Co_06505T0.C
Co_06515T0.A
Co_06515T0.C
Co_06928T0.A
Co_06928T0.C
Co_07046T0.C
Co_07046T0.D
Co_07046T0.E
Co_07046T1.C
Co_07046T1.D
Co_07046T1.E
Co_07939T0.C
Co_07939T0.D
Dm_CG30178.A
Dm_CG30178.C
Dm_CG31624.A
Dm_CG31624.C
Dm_CG31988.A
Dm_CG31988.C
Dm_CG34325.A
Dm_CG34325.C
Dm_Pax.C
Dm_Pax.C-d
Dm_Tungus.B
Dm_Tungus.B-i
Dm_Zyx102EF.A
Mb_19246.A
Mb_19246.C
Ml_001118a.C
Ml_04674a.C
Ml_064935a.A
Ml_06737a.A
Ml_07501b.A
Ml_07501b.C
Ml_07501b.D
Ml_093519b.C
Ml_108023b.A
Ml_108023b.B
Ml_11321a.A
Ml_120740b.A
Ml_15452a.B
Ml_20602b.A
Nv_104924.C
Nv_239144.A
Nv_239144.B
Nv_98128.B
Sr_07306T0.A
Sr_07306T0.C
Sr_08126T0.A
Sr_08126T0.B
Sr_08126T0.C
Ta_13161.A
Ta_13161.C
Ta_16471.B
Ta_20314.A
Ta_58345.A
Ta_58345.B
Ta_58696.A
